1  
2  
3  
4  
5  
6  
7  
8  
9  
10  
11  
12  
13  
14  
15  
16  
17  
18  
19  
20  
21  
22  
23  
24  
25  
26  
27

**Identification and characterization of OmpT-like proteases  
in uropathogenic *Escherichia coli* clinical isolates**

**Isabelle Desloges<sup>1</sup>, James A. Taylor<sup>1,8</sup>, Jean-Mathieu Leclerc<sup>1</sup>, John R. Brannon<sup>1</sup>,  
Andrea Portt<sup>1,9</sup>, John D. Spencer<sup>2</sup>, Ken Dewar<sup>3,4</sup>, Gregory T Marczyński<sup>1,3</sup>, Ameer  
Manges<sup>5</sup>, Samantha Gruenheid<sup>1,3</sup>, Hervé Le Moual<sup>1,3,6⊗</sup>, and Jenny-Lee Thomassin<sup>1,7§</sup>**

<sup>1</sup> Department of Microbiology and Immunology, McGill University, Montreal, QC, Canada

<sup>2</sup> Division of Nephrology, Nationwide Children's Hospital, Columbus, OH, USA

<sup>3</sup> Microbiome and Disease Tolerance Centre, McGill University, Montreal, QC, Canada

<sup>4</sup> Department of Human Genetics, McGill University, Montreal, QC, Canada

<sup>5</sup> School of Population and Public Health, University of British Columbia, Vancouver, BC, Canada

<sup>6</sup> Faculty of Dentistry, McGill University, Montreal, QC, Canada

<sup>7</sup> Current: Department of Structural Biology and Chemistry, Institut Pasteur, Paris, France

<sup>8</sup> Current: Department of Cellular and Molecular Medicine, University of Ottawa, Ottawa, ON, Canada

<sup>9</sup> Current: Dalla Lana School of Public Health, University of Toronto, Toronto, ON, Canada

⊗ Deceased

§ Corresponding author

Corresponding author information:

JLT: [jenny-lee.thomassin@pasteur.fr](mailto:jenny-lee.thomassin@pasteur.fr)

Running title: OmpT-like proteases in UPEC

Key words: OmpT, OmpP, ArlC, antimicrobial peptides, RNase 7, LL-37, UPEC

28 **Abstract**

29 Bacterial colonization of the urogenital tract is limited by innate defenses, including the  
30 production of antimicrobial peptides (AMPs). Uropathogenic *Escherichia coli* (UPEC) resist  
31 AMP-killing to cause a range of urinary tract infections (UTIs) including asymptomatic  
32 bacteriuria, cystitis, pyelonephritis, and sepsis. UPEC strains have high genomic diversity and  
33 encode numerous virulence factors that differentiate them from non-UTI causing strains,  
34 including *ompT*. As OmpT homologues cleave and inactivate AMPs, we hypothesized that  
35 high OmpT protease activity-levels contribute to UPEC colonization during symptomatic  
36 UTIs. Therefore, we measured OmpT activity in 58 UPEC clinical isolates. While  
37 heterogeneous OmpT activities were observed, OmpT activity was significantly greater in  
38 UPEC strains isolated from patients with symptomatic infections. Unexpectedly, UPEC  
39 strains exhibiting the greatest protease activities harboured an additional *ompT*-like gene  
40 called *arlC* (*ompTp*). The presence of two OmpT-like proteases in some UPEC isolates led us  
41 to compare the substrate specificities of OmpT-like proteases found in *E. coli*. While all three  
42 cleaved AMPs, cleavage efficiency varied on the basis of AMP size and secondary structure.  
43 Our findings suggest the presence ArlC and OmpT in the same UPEC isolate may confer a  
44 fitness advantage by expanding the range of target substrates.

## 45 **1 Introduction**

46 Urinary tract infections (UTIs) are among the most common cause of bacterial infections  
47 requiring antibiotic treatment (Flores-Mireles, Walker, Caparon, & Hultgren, 2015; Foxman,  
48 2014; Hooton & Stamm, 1997). The majority of community acquired UTIs (70-95%) and  
49 recurrent UTIs are caused by uropathogenic *Escherichia coli* (UPEC) (Flores-Mireles et al.,  
50 2015; Nielubowicz & Mobley, 2010). The human gut acts as a reservoir for UPEC strains  
51 where they form part of the fecal flora (Kaper, Nataro, & Mobley, 2004; Moreno et al., 2006).  
52 Following colonization of the periurethral area, UPEC infect the urinary tract in an ascending  
53 manner, resulting in diseases ranging from asymptomatic bacteriuria (ABU), cystitis,  
54 pyelonephritis and sepsis (Hooton, 2012). UPEC strains have high genomic diversity and  
55 encode numerous virulence factors that differentiate them from non-UTI causing strains  
56 (Johnson, 1991; Lloyd, Rasko, & Mobley, 2007; Najafi, Hasanpour, Askary, Aziemzadeh, &  
57 Hashemi, 2018; Norinder, Koves, Yadav, Brauner, & Svanborg, 2012). These virulence  
58 factors contribute to disease progression allowing UPEC to colonize the uroepithelium,  
59 produce toxins, scavenge metabolites, and evade the host immune system (Schwab, Jobin, &  
60 Kurts, 2017; Terlizzi, Gribaudo, & Maffei, 2017).

61

62 Bacterial colonization is limited in the upper urogenital tract by several mechanisms including  
63 urine flow, chemical properties of urine, epithelial cell shedding, influx of immune cells  
64 including neutrophils upon bacterial stimulation, and secretion of soluble proteins and  
65 peptides by epithelial cells (Spencer, Schwaderer, Becknell, Watson, & Hains, 2014;  
66 Weichhart, Haidinger, Horl, & Saemann, 2008). Secreted proteins and antimicrobial peptides  
67 (AMPs) form part of the innate immune defenses of the urogenital tract and act through  
68 immunomodulation, indirect anti-colonization activity or direct bacterial killing (Kai-Larsen  
69 et al., 2010; Zasloff, 2007). AMPs are small (12-50 amino acids), cationic, amphipathic

70 peptides that exert bactericidal action by interacting with anionic bacterial membranes to form  
71 pores resulting in bacterial lysis (Jenssen, Hamill, & Hancock, 2006). Two types of AMPs are  
72 detected in the urogenital tract: defensins that form small disulfide bond stabilized  $\beta$ -sheets  
73 and the  $\alpha$ -helical cathelicidin LL-37 (Chromek et al., 2006; Lehmann et al., 2002; Valore et  
74 al., 1998). In addition, the urogenital tract produces large structured antimicrobial proteins  
75 called ribonucleases (RNase) (Spencer et al., 2011; Spencer et al., 2013). Human  $\alpha$ -defensin 5  
76 (HD5), human  $\beta$ -defensins (hBD) 1 and 2, LL-37 and RNase 7 are thought to prevent  
77 bacterial colonization as they are constitutively expressed in the urinary tract (Kjolvmark,  
78 Akesson, & Pahlman, 2017; Spencer et al., 2012). During UTIs HD5, hBD2, LL-37 and  
79 RNase 7 production increases, suggesting an active role in bacterial clearance (Chromek &  
80 Brauner, 2008; Chromek et al., 2006; Nielsen et al., 2014; Spencer et al., 2012; Spencer et al.,  
81 2013). Remarkably, increased cathelicidin expression and LL-37 secretion is triggered a few  
82 minutes after bacteria encounter uroepithelial cells. This suggested role for AMPs in UTI  
83 immune defense is consistent with reports that UPEC strains are generally more resistant to  
84 AMPs than commensal *E. coli* strains that do not colonize the urogenital tract (Chromek et al.,  
85 2006).

86

87 Gram-negative bacteria use several mechanisms to resist killing by AMPs, including capsules,  
88 efflux pumps, LPS modifications, and proteases (Gruenheid & Le Moual, 2012). OmpT  
89 proteases are found in the Gram-negative outer bacterial membrane and have a conserved  
90 active site with features of both aspartate and serine proteases (Kramer et al., 2001;  
91 Vandeputte-Rutten et al., 2001). With their active sites facing the extracellular environment,  
92 ompTins contribute to virulence by cleaving a variety of proteins and peptides (Haiko,  
93 Suomalainen, Ojala, Lahtenmaki, & Korhonen, 2009). Both substrate specificity and amino  
94 acid identity are used to classify ompTins into Pla-like and OmpT-like subfamilies. Pla readily

95 cleaves the proenzyme plasminogen into active plasmin to promote bacterial dissemination  
96 during both bubonic and pneumonic plague (Lathem, Price, Miller, & Goldman, 2007;  
97 Sodeinde et al., 1992; Zimble, Schroeder, Eddy, & Lathem, 2015). OmpT rapidly cleaves  
98 and inactivates AMPs, including LL-37, protamine, and a synthetic peptide optimized to have  
99 maximum antibacterial activity called C18G (Brannon, Thomassin, Desloges, Gruenheid, &  
100 Le Moual, 2013; Stumpe, Schmid, Stephens, Georgiou, & Bakker, 1998; Thomassin,  
101 Brannon, Gibbs, Gruenheid, & Le Moual, 2012). OmpT-mediated AMP inactivation is  
102 thought to support host colonization by some pathogenic *E. coli* strains (Thomassin, Brannon,  
103 Gibbs, Gruenheid, & Le Moual, 2012). In addition to OmpT, two OmpT-like proteases have  
104 been described in *E. coli* strains (Kaufmann, Stierhof, & Henning, 1994; McPhee et al., 2014;  
105 Zhuge et al., 2018), these genes, called *ompP* and *arlC* (*ompTp*) encode proteins that have  
106 approximately 74% amino acid identity to OmpT. While the physiological substrates of  
107 OmpP and ArlC are unknown, OmpP has been shown to cleave the AMP protamine and ArlC  
108 is associated with AMP resistance (Hwang et al., 2007; McPhee et al., 2014).

109

110 The *ompT* gene is present in the genome of 85-97% of UPEC clinical isolates and is used in  
111 epidemiological studies to identify virulent UPEC strains, yet its function across clinical  
112 isolates remains unclear (Foxman, Zhang, Palin, Tallman, & Marrs, 1995). As OmpT and  
113 OmpT-like omptins play roles in resistance to host-produced AMPs, we hypothesized that  
114 high OmpT protease activity-levels contribute to UPEC colonization during symptomatic  
115 UTIs. To test this hypothesis, we detected *ompT* and measured OmpT activity in a collection  
116 of 58 UPEC clinical isolates from groups of patients with infections of differing clinical  
117 severity (fecal, ABU, UTI [cystitis and pyelonephritis] and sepsis). Heterogeneous OmpT  
118 activity was observed and in some isolates high protease activity was correlated with the  
119 presence of an additional *ompT*-like gene called *arlC* (*ompTp*). The presence of two OmpT-

120 like proteases in some UPEC isolates led us to compare the substrate specificity of the three  
121 *E. coli* omptins (OmpT, OmpP and ArlC). We found that OmpT, OmpP and ArlC all cleave  
122 AMPs, although cleavage efficiency of different AMP-types varied. Our results suggest that  
123 the presence of multiple omptins allows UPEC to cleave at least two major subsets of AMPs  
124 encountered during infection.

## 125 **2 Material and Methods**

### 126 **2.1 Bacterial Strains and Growth Conditions**

127 58 ExPEC isolates originating from patients diagnosed with extraintestinal infections or from  
128 the urine or stool of healthy individuals were obtained from the Manges collection. Included  
129 isolates were randomly selected from the *E. coli* category to ensure they were representative.  
130 Isolates were divided into 4 groups based on disease type. Fecal isolates ( $n = 12$ ) were  
131 recovered from the feces of healthy subjects in Québec Canada (2009-2010), ABU isolates ( $n$   
132 = 10) were from patients with asymptomatic bacteriuria in California USA (2005-2006)  
133 (Manges, Johnson, & Riley, 2004), UTI isolates ( $n = 24$ ) were recovered from patients with  
134 cystitis in Québec Canada (2005-2007) (Manges, Tabor, Tellis, Vincent, & Tellier, 2008) and  
135 cystitis or pyelonephritis in California USA (1999-2000) (Manges, Dietrich, & Riley, 2004),  
136 and sepsis isolates ( $n = 12$ ) were from patients with sepsis in California USA (2001-2003)  
137 (Manges, Perdreau-Remington, Solberg, & Riley, 2006). Bacterial strains used in this study  
138 are listed in Table 1. Bacteria were routinely cultured in lysogeny broth (LB; 10% (w/v)  
139 tryptone, 5% (w/v) yeast extract, 10% (w/v) NaCl) or in N-minimal medium (50 mM Bis-  
140 Tris, 5 mM KCl, 7.5 mM  $(\text{NH}_4)_2\text{SO}_4$ , 0.5 mM  $\text{K}_2\text{SO}_4$ , 0.5 mM  $\text{KH}_2\text{PO}_4$ , 0.1% casamino  
141 acids) adjusted to pH 7.5, supplemented with 1.4% glucose and 1 mM  $\text{MgCl}_2$  (UPEC isolates)  
142 or with 0.5% glucose and 1 mM  $\text{MgCl}_2$  (all other strains). Bacteria were cultured at 37°C with  
143 aeration (220 rpm).

144

### 145 **2.2 Multiplex PCR of UPEC Virulence Genes**

146 Total DNA (genomic and large-plasmid DNA) was isolated using the Puregene Yeast/Bact.  
147 kit (Qiagen). Phylogenetic groups were determined as described in (Clermont, Bonacorsi, &  
148 Bingen, 2000), using primer pairs listed in Table 2. To detect virulence genes present in the  
149 isolates, primer sequences were obtained from previous studies (Johnson & Stell, 2000) or

150 designed *de novo* for this study (Table 2). Three multiplex PCR experiments were performed  
151 as follows: pool 1: *hlyA* (1177 bp), *papAH* (720 bp), *fimH* (508 bp), *kspMTIII* (392 bp), and  
152 *papEF* (336 bp); pool 2; *papC* (200 bp), *sfaS* (240 bp), *cnfI* (498 bp), *fyuA* (880 bp), *iutA* (300  
153 bp), *kpsMTII* (272 bp); pool 3: *arlC* (852 bp), *ompT* (670 bp) and *fimH* (508 bp); *ompP* (648  
154 bp).

155

### 156 **2.3 Fluorescence Resonance Energy Transfer (FRET) Activity Assay**

157 The FRET substrate containing a dibasic motif (RK) in its center (2Abz-SLGRKIQI-K(Dnp)-  
158 NH<sub>2</sub>) was purchased from Anachem. Bacteria were grown in N-minimal medium to mid-  
159 exponential phase and normalized to an OD<sub>595nm</sub> of 0.5. Bacterial cells were pelleted and  
160 resuspended in phosphate-buffered saline (PBS). Bacteria (~ 2.25 x 10<sup>7</sup> CFU in 75 μL) were  
161 mixed in a 96-well plate with 75 μL of the FRET substrate (final concentration 3 μM).  
162 Fluorescence (λ Ex 325 nm, λ Em 430 nm) was monitored for 1 h at 25°C using a Biotek FLx  
163 800 plate reader. Data were normalized by subtracting the background fluorescence of the  
164 FRET substrate in PBS.

165

### 166 **2.4 Plasmid construction**

167 The *ompT* and *arlC* genes were PCR-amplified from DNA isolated from the UPEC UTI  
168 clinical isolate 6, also called cystitis 6, using their respective primer pairs *ompT\_cf/ompT\_cr*  
169 and *arlC\_cf/arlC\_cr* (Table 2). PCR fragments were treated with XbaI and SacI and ligated  
170 into plasmid pWSK129 treated with the same enzymes, generating plasmids pWSK*ompT* and  
171 pWSK*arlC* (Table 1). The *ompP* gene was PCR-amplified from XL1-Blue DNA using primer  
172 pair *ompP\_cf/ompP\_cr*. PCR-products were treated with XbaI and PstI and ligated into  
173 pWSK129 treated with the same enzymes to generate plasmid pWSK*ompP*. The *pla* gene  
174 under control of the *croP* promoter was subcloned from pYC*pla* (Brannon, Burk, et al., 2015)



175 using XbaI and SacI and ligated into pWSK129 previously treated with the same enzymes,  
176 generating pWSK $_{pla}$ .

177

## 178 **2.5 Southern Blotting**

179 Total DNA was isolated and treated with EcoRV. Southern blotting and hybridization were  
180 performed as previously described (Taylor, Ouimet, Wargachuk, & Marczynski, 2011) using  
181 Hybond-XL membranes. Probes for *ompT* and *arlC* were PCR-generated using primer pairs  
182 *ompT\_sf/ompT\_sr* and *arlC\_sf/arlC\_sr*, respectively (Table 2). Probes were radiolabelled with  
183 dATP [ $\alpha$ -<sup>32</sup>P] using the RadPrime kit (Invitrogen). The pWSK $_{arlC}$  plasmid was used as the  
184 positive control for the *arlC* probe.

185

## 186 **2.6 Quantitative RT-PCR**

187 Quantitative RT-PCR (qPCR) was performed as previously described (Thomassin, Brannon,  
188 Gibbs, et al., 2012). Briefly, bacterial strains were grown to an OD<sub>595nm</sub> of 0.5 in N-minimal  
189 medium. Total RNA was isolated using TRIzol reagents (Invitrogen) and treated with  
190 TURBO DNase I (Ambion) to remove residual DNA. The absence of DNA was confirmed by  
191 qPCR using the primer pair *rpoD\_qf/rpoD\_qr*. RNA (100 ng) was reverse transcribed using  
192 Superscript II (Invitrogen) with 0.5  $\mu$ g of random hexamer primers. A reaction mixture  
193 without Superscript II was also included and was used as the negative control. qPCR reactions  
194 were performed in a Rotor-Gene 3000 thermal cycler (Corbett Research) using the Maxima  
195 SYBR Green qPCR kit (Thermo Scientific), according to the manufacturer's instructions.  
196 Primers used are listed in Table 2. The relative expression levels were calculated by  
197 normalizing the threshold cycle ( $C_T$ ) of *ompT* and *arlC* transcripts to the  $C_T$  of *rpoD* using the  
198  $2^{-\Delta C_T}$  method (Livak & Schmittgen, 2001).

199

## 200 **2.7 Whole genome sequencing**

201 Sequencing was performed on a PacBio platform (Pacific Biosciences). Genomic DNA  
202 samples were purified using the Gentra® Puregene® kit (Qiagen) and sheared to 20 kb using  
203 g-tubes (Covaris). Libraries were prepared using the template preparation kit from Pacific  
204 Biosciences. A single SMRT cell was sequenced to generate data sets including unique sub-  
205 reads with a minimum length of 3 kb. Genome assemblies of sequence reads were generated  
206 using a combination of HGAP/Celera/Quiver following Pacific Biosciences  
207 recommendations. The complete chromosome and plasmid sequences were submitted to  
208 GenBank.

209

## 210 **2.8 Preparation of whole-cell lysates and outer-membrane fractions**

211 Bacteria were grown in N-minimal medium until mid-exponential phase and normalized to an  
212 OD<sub>595nm</sub> of 0.5. For whole-cell lysate samples, bacterial cells were pelleted and resuspended  
213 in 1/10 volume of 2X ESB (Thomas et al., 2005). Outer-membrane fractions were isolated as  
214 follows: bacterial cultures were centrifuged at 2500 rpm for 10 min and pellets were  
215 resuspended in 1.5 mL low-salt buffer (100 mM NaPi buffer [pH 7], 5 mM EDTA and 10%  
216 glycerol). Samples were supplemented with 10 uL PMSF and sonicated. Samples were then  
217 centrifuged at 5500 rpm for 10 min. Supernatants were collected and centrifuged at 65000  
218 rpm for 30 min at 4°C. Pellets were resuspended in 2 mL sarcosyl buffer (10 mM Tris [pH  
219 7.5], 5 mM MgCl<sub>2</sub> and 2% sarcosyl) and incubated for 30 minutes at 10°C. Samples were  
220 then centrifuged for 60 min at 45000 rpm and the pellet containing outer membranes was  
221 resuspended in buffer (20 mM Tris-HCl pH 7.5 and 10% glycerol). Outer membrane samples  
222 were combined 1:1 with 2X ESB and boiled for 10 minutes prior to loading samples on an  
223 SDS-PAGE gel.

224

## 225 **2.9 Western blotting**

226 Whole-cell lysate and outer-membrane fractions were resolved on a 10% SDS-PAGE gel and  
227 transferred to a polyvinylidene fluoride membrane. Membranes were blocked for 1 h in Tris-  
228 buffered saline (TBS) supplemented with 5% skim milk and incubated overnight with the  
229 polyclonal anti-CroP antibody (Thomassin, Brannon, Gibbs, et al., 2012). Membranes were  
230 washed extensively with TBS and incubated for 1 h with a goat anti-rabbit secondary  
231 antibody conjugated with HRP. Membranes were washed and developed using  
232 chemiluminescent HRP substrate.

233

## 234 **2.10 Plasminogen activation assay**

235 Bacteria were grown in N-minimal medium to mid-exponential phase and normalized to an  
236 OD<sub>595nm</sub> of 0.5. Bacterial cells were pelleted and resuspended in ½ volume of phosphate-  
237 buffered saline (PBS; final 6 x10<sup>8</sup> CFU/mL). In a 96 well plate, 178 µL of bacteria and 20 µL  
238 of 45 mM VLKpNA (Sigma Aldrich) were combined. Baseline assays were performed at  
239 OD<sub>405nm</sub>. After 5 min, 4 µg of plasminogen substrate was added and absorbance (405nm) was  
240 measured every 10 min for 400 minutes at 37 °C with agitation before every reading.

241

## 242 **2.11 Proteolytic cleavage of AMPs**

243 Bacteria were grown in N-minimal medium to mid-exponential phase, washed and  
244 normalized to an OD<sub>595nm</sub> of 0.5 in PBS. Aliquots of bacteria (10<sup>7</sup> CFU) were combined 1:4  
245 (v/v) with 2 µg/µL LL-37, mCRAMP, C18G or Magainin II (BioChemia) or 1 µg/µL RNase  
246 7 and incubated at room temperature for various time points. Bacteria were separated from  
247 peptide cleavage products by centrifugation and supernatants were combined 1:1 with 2X  
248 ESB then boiled and frozen at -20°C. Peptide cleavage products were resolved on 10-20%  
249 Tris-Tricine gels (BioRad) and RNase 7 samples were resolved on 20% SDS-PAGE gels.

250 Peptides were fixed in the gel by incubation in 20% (v/v) glutaraldehyde for 30 min; gels  
251 were rinsed with water and peptides stained for 1h with Coomassie blue G-250 stain. Gels  
252 were destained in 20% (v/v) acetic acid.

253

## 254 **2.12 Circular dichroism spectroscopy**

255 Experiments were performed on a Jasco J-810 spectropolarimeter (Easton, MD). AMPs (200  
256  $\mu\text{g/ml}$  in PBS) were placed in a quartz cuvette with a path length of 0.1 cm and spectra were  
257 recorded from 260 to 195 nm. Samples were scanned three times at 20°C using a bandwidth  
258 of 1 nm, a time response of 2 sec and a scan rate of 100 nm/min. Spectra were corrected by  
259 subtracting the background spectrum of PBS and values were converted from ellipticity to  
260 mean residue ellipticity (MRE;  $\text{degree} \times \text{cm}^2 \times \text{dmol}^{-1}$ ).

261

## 262 **2.13 Statistical Analyses**

263 Data were analyzed using GraphPad Prism software. Normality was verified using  
264 D'Agostino-Pearson normality test. Fisher's Exact test was performed to compare incidence  
265 of virulence genes within severity groups of UPEC clinical isolates. FRET activity was  
266 assessed using a two way ANOVA with Tukey's post test.  $P$  value  $\leq .05$  being significantly  
267 different.

## 268 **3 RESULTS**

### 269 **3.1 Phylogenetic and virulence profile of UPEC isolates**

270 UPEC isolates from patients with different disease severities were obtained from the Manges  
271 collection (Manges, Dietrich, et al., 2004; Manges et al., 2001; Manges, Johnson, et al., 2004;  
272 Manges et al., 2006; Manges et al., 2008). Although UPEC strains are heterogeneous, clinical  
273 isolates from UTIs predominantly belong to *E. coli* phylogenetic groups B2 and D (Johnson,  
274 Delavari, Kuskowski, & Stell, 2001). To confirm that our isolates are generally representative  
275 of UPEC clinical strains we determined the phylogenetic grouping of our 58 clinical isolates  
276 categorized into the fecal (n=12), ABU (n=10), UTI (cystitis and pyelonephritis; n=24), and  
277 sepsis (n=12) groups. Most isolates from the ABU and UTI groups associated with UTIs  
278 belong to the phylogenetic group B2 and, to a lesser extent, D (Table 3). In contrast, isolates  
279 from the sepsis group were predominantly from group D (Table 3). Finally, isolates from the  
280 fecal group had the most variable phylogenetic grouping with 5/12 isolates belonging to  
281 phylogenetic groups A and B1 (Table 3). Overall, this distribution is in agreement with  
282 previous reports showing that UPEC strains mainly belong to *E. coli* phylogenetic groups B2  
283 and D (Johnson et al., 2001).

284

285 The 58 isolates were further characterized using multiplex PCR to detect 12 recognized UPEC  
286 virulence genes (Table. 4). Our data showed variations consistent with previous studies  
287 reporting that UPEC is a heterogeneous pathotype (Marschall et al., 2012; Maynard et al.,  
288 2004; Norinder et al., 2012; Poey, Albini, Saona, & Lavina, 2012). The *fimH* gene, involved  
289 in UPEC adherence, was present in all but 2 ABU isolates (Table 4). There was a difference  
290 in the distribution of virulence genes *fyuA* and *ompT* for which the incidence was significantly  
291 higher in symptomatic (i.e UTI and sepsis) groups than asymptomatic (i.e. fecal and ABU)  
292 groups (Table 4). No other genes showed a significant difference in incidence between

293 asymptomatic and symptomatic groups. In agreement with previous studies, we found that  
294 *ompT* is present in 89% of the UPEC isolates associated with symptomatic infections (Table  
295 4).

296

### 297 **3.2 Variability of omptin proteolytic activities among UPEC isolates**

298 OmpT preferentially cleaves substrates between two consecutive basic residues (Dekker, Cox,  
299 Kramer, & Egmond, 2001; McCarter et al., 2004). Therefore, to assess OmpT proteolytic  
300 activity we measured cleavage of a FRET substrate (2Abz-SLGRKIQI-K(Dnp)-NH<sub>2</sub>) that  
301 contains a dibasic motif in its center (Brannon, Burk, et al., 2015; Brannon et al., 2013;  
302 McPhee et al., 2014; Thomassin, Brannon, Gibbs, et al., 2012). Cleavage of the substrate by  
303 the 58 UPEC isolates was monitored by measuring fluorescence emission over time and  
304 compared with substrate cleavage by the previously characterized reference UPEC strain  
305 CFT073 (Brannon et al., 2013). As shown in Fig. 1A, omptin activity of the isolates was  
306 heterogeneous between groups. Isolates for which the *ompT* gene was not detected by PCR  
307 showed basal activity levels (red triangles in Fig. 1A), whereas isolates harbouring the *ompT*  
308 gene showed a wide range of omptin activity. The omptin activity of the isolates of the fecal  
309 group was significantly lower than that of the 2 symptomatic groups (UTI and sepsis) (Fig.  
310 1A). The mean activity of the isolates from the fecal group ( $0.75 \pm 0.5$ ) was lower than that of  
311 strain CFT073. In contrast, the activity means of the symptomatic groups ( $1.54 \pm 0.66$  and  
312  $1.71 \pm 0.66$ ) were higher than that of CFT073. Extensive variability in omptin activity was  
313 also observed within groups (Fig. 1A). The UTI group exhibited the most heterogeneous  
314 omptin activity and some isolates from the UTI group had 3-fold higher omptin activity than  
315 CFT073. Together, these results indicate that omptin activity is variable among fecal and  
316 UPEC clinical isolates.

317

### 318 **3.3 OmpT-like proteases in UPEC**

319 In addition to the chromosomally-encoded *ompT* gene, plasmid-borne *ompT*-like genes *ompP*  
320 and *arlC* are present in several *E. coli* strains (Kaufmann et al., 1994; McPhee et al., 2014;  
321 Zhuge et al., 2018). These OmpT-like proteins are approximately 74% identical to OmpT. To  
322 determine whether the presence of *ompT*-like genes in some isolates may account for the  
323 heterogeneity of OmpT activity observed in Fig. 1A, multiplex-PCR screens were performed  
324 to detect *ompT*, *ompP* and *arlC*. The *ompP* gene was not detected in any of the isolates (data  
325 not shown). In contrast, the *arlC* gene was present in 8 of the 58 isolates (Fig. 1B). Strikingly,  
326 *arlC* was only present in symptomatic isolates, which was statistically significant according to  
327 a Fisher's exact test ( $P = .0445$ ). Most isolates harbouring the *arlC* gene also contained *ompT*  
328 and generally had higher proteolytic activity (green circles, Fig. 1A) than CFT073. This is  
329 consistent with the report that ArlC cleaves the FRET substrate (McPhee et al., 2014). Isolate  
330 18 from the UTI group did not have *ompT* but harboured *arlC* (Fig. 1B); this isolate exhibited  
331 moderate proteolytic activity (purple triangle in Fig. 1A). Together these data show that  
332 among commensal and clinical isolates, higher omptin activity is associated with symptomatic  
333 disease and isolates with the greatest omptin activity harbour both the *ompT* and *arlC* genes.

334

### 335 **3.4 Variability of *ompT* and *arlC* expression among select UPEC cystitis isolates**

336 To further understand omptin activity among UPEC isolates, we selected 12 isolates from the  
337 UTI group (Table 1) for further analysis because they have the most heterogeneous omptin  
338 activity. The presence of *ompT* genes in these isolates was confirmed by Southern blot  
339 analysis (Fig. 2A). This analysis also indicated that two *ompT* genes may be present in  
340 isolates 7, 8 and 11. Consistent with the multiplex PCR results, *arlC* was detected in UTI  
341 isolates 1, 6 and 11 (Fig. 2A). Next, qPCR was used to measure the expression levels of *ompT*  
342 and *arlC*. In agreement with our activity assay, *ompT*-levels were heterogeneous among these

343 UTI isolates (Fig. 2B and 2C). Only three isolates (2, 10 and 11) had similar expression levels  
344 as the reference strain CFT073, whereas all other isolates had higher *ompT* expression levels  
345 than the reference strain. As expected from the multiplex-PCR screen and Southern blot, *arlC*  
346 expression was only detected in UTI 1, 6 and 11 isolates. UTI isolates 1 and 6, which showed  
347 the highest *ompT* and *arlC* expression levels also had the highest omptin activity-levels (Fig.  
348 2C). Although both *ompT* and *arlC* are present in UTI isolate 11, they have low expression  
349 levels, which is consistent with the low omptin activity observed (Fig. 2C). These data  
350 indicate that heterogeneous omptin activity-levels are associated with both the presence and  
351 the different expression levels of the *ompT* and *arlC* genes.

352

### 353 **3.5 *arlC* is present on plasmids**

354 To determine the genomic context of the *ompT* and *arlC* genes, isolates 1, 6 and 11 of the UTI  
355 group were sequenced on a PacBio platform. These isolates were then renamed cystitis 1,  
356 cystitis 6 and cystitis 11. Detailed descriptions of genomes and gene features are found in  
357 Appendix (Appendix Figs. 1AB, 2AB, 3). In all three isolates, *ompT* was located within the  
358 bacterial chromosome and *arlC* was part of large plasmids (79-200 kbp; Appendix Fig. 1A  
359 and 2A). In addition, the *ompT* gene was invariably located downstream of *nfrA* and *ybcH*  
360 (Fig 3A). Some differences were noted in the genomic context of *ompT* among the clinical  
361 isolates. In cystitis 1 and 6 the *envY* gene, encoding a transcriptional regulator of porin  
362 synthesis, is inserted between *ybcH* and *ompT* (182 bp downstream of *ybcH*, 512 bp upstream  
363 of *ompT*). The *appY* gene, encoding a transcriptional activator, is located 249 bp downstream  
364 of the *ompT* gene in cystitis 1, whereas *ymcE*, encoding a putative cold shock gene, is located  
365 186 bp downstream of *ompT* in cystitis 6. In cystitis 11 the *ompT* gene is located 657 bp  
366 downstream of *ybcH* and 272 bp upstream of *ybcY*; this is the same genomic context as that in  
367 UPEC strains CFT073, UTI89, 536, J96 ABU83972 and EPEC strain e2348/69, all of which



368 were reported to have low omptin activity (Fig. 3A, (Brannon et al., 2013; Thomassin,  
369 Brannon, Gibbs, et al., 2012; Thomassin, Brannon, Kaiser, Gruenheid, & Le Moual, 2012)).  
370 For all isolates, the predicted amino acid sequence of ArlC is 100% identical to ArlC  
371 identified in adherent-invasive *E. coli* (AIEC) strain NRG857c (McPhee et al., 2014).  
372 Although the three plasmids harbouring *arlC* were different (Appendix Fig. 2A and B), *arlC*  
373 was present in all cases as part of pathogenicity island PI-6 previously reported to play a role  
374 in AMP resistance (Fig. 3B, MCPhee et al., 2014).

375

### 376 **3.6 Comparative analysis of OmpT, OmpP and ArlC**

377 With the unexpected detection of *arlC* among the UPEC clinical isolates, we hypothesized  
378 that the presence of a second or even a third omptin protease within a single species may  
379 provide an advantage by expanding the potential range of substrates cleaved. Therefore, we  
380 sought to compare the substrate specificities of these proteases. As OmpT undergoes auto-  
381 cleavage during purification (Kramer, Zandwijken, Egmond, & Dekker, 2000; Vandeputte-  
382 Rutten et al., 2001) and mutagenesis of residues to stabilize the protein results in a significant  
383 decrease in FRET substrate cleavage ((Kramer et al., 2000); unpublished data Thomassin JL  
384 and Brannon JR) it was not possible to purify these proteases and directly compare their  
385 activities. Instead, we produced OmpT, OmpP and ArlC in *E. coli* BL21, a laboratory strain  
386 that lacks omptin proteases. To test their production and correct localization in BL21, omptin  
387 proteins were detected by western blot analysis from both whole cells and outer-membrane  
388 preparations (Fig. 4A). To determine if the proteases were active in BL21, FRET substrate  
389 cleavage was monitored over time. As expected, BL21 with empty vector did not cleave the  
390 FRET substrate, whereas the three omptins readily cleaved the FRET substrate (Fig. 4B). This  
391 demonstrates that when produced in BL21, ArlC, OmpP and OmpT are found in the outer  
392 membrane and are proteolytically active.

393

394 Omptin proteases are generally subdivided into OmpT-like or Pla-like subfamilies. These  
395 subfamilies differ in their ability to cleave plasminogen to activate it into active plasmin, with  
396 Pla-like omptins producing active plasmin more readily than OmpT-like omptins (Haiko et  
397 al., 2009; Kukkonen et al., 2001). To verify that the three omptin proteases belong in the  
398 OmpT-like subfamily, we tested their ability to cleave plasminogen into plasmin. Consistent  
399 with their presence in the outer membrane, all three omptins cleaved plasminogen to a greater  
400 extent than BL21 alone (Fig. 4C). There was no difference in their ability to activate  
401 plasminogen. Compared with the positive control, Pla produced in BL21, the *E. coli* omptins  
402 converted significantly less plasminogen into plasmin. These data are consistent with previous  
403 publications (Brannon, Burk, et al., 2015; Kukkonen et al., 2001; McPhee et al., 2014) and  
404 suggest that all three omptins found in *E. coli* belong to the OmpT-like subfamily of omptin  
405 proteases.

406

407 Omptin proteases belonging to the OmpT-like subfamily have been associated with AMP  
408 cleavage (Le Sage et al., 2009; Stumpe et al., 1998; Thomassin, Brannon, Gibbs, et al., 2012).  
409 Previous work has shown that OmpT from EPEC, EHEC, and UPEC cleave the human  
410 cathelicidin LL-37. Although ArlC was shown to play a role in AMP-resistance (McPhee et  
411 al., 2014), and OmpT and OmpP are reported to exhibit similar substrate specificities (Hwang  
412 et al., 2007; McCarter et al., 2004), their ability to cleave different AMPs has not been  
413 directly compared. Therefore, we investigated the ability of the *E. coli* omptins to cleave the  
414 synthetic cationic peptide C18G and various cathelicidins Magainin II (*Xenopus laevis*),  
415 mCRAMP (*Mus musculus*) and LL-37 (*Homo sapiens*). As expected, AMPs incubated with  
416 BL21 did not show any degradation or cleavage products, indicating that BL21 does not  
417 contain intrinsic proteases that cleave these AMPs (Fig 5A). OmpT cleaved all peptides by the

418 first time point tested (2 min C18G; 15 min mCRAMP, Magainin II and LL-37; Fig. 5A).  
419 Similarly to OmpT, OmpP readily cleaved C18G and Magainin II within 2 and 30 min,  
420 respectively. In contrast, OmpP only cleaved small amounts of mCRAMP after 60 min and  
421 did not appear to cleave LL-37 (Fig. 5A). ArlC cleaved mCRAMP, C18G and Magainin II by  
422 the first time point tested (2 min C18G; 15 min mCRAMP and Magainin II), but only a small  
423 amount of LL-37 cleavage was observed after 60 minutes. Substrate properties, such as size  
424 and secondary structure are known to influence omptin activity (Brannon, Thomassin,  
425 Gruenheid, & Le Moual, 2015; Hritonenko & Stathopoulos, 2007). Given that all three  
426 proteases readily cleave the FRET substrate and C18G, the striking differences in ability to  
427 cleave Magainin II, mCRAMP and LL-37 are likely due to intrinsic differences between  
428 OmpT, OmpP and ArlC. Although all peptides tested contain sites with two consecutive basic  
429 residues, they range in size from 18-37 amino acids (Fig. 5B). OmpP cleaved smaller peptides  
430 such as C18G and Magainin II more readily than the larger mCRAMP and LL-37. As ArlC  
431 cleaved mCRAMP more rapidly than OmpT, peptide length might not be the limiting factor  
432 for this protease. Peptide secondary structure also influences omptin activity (Brannon,  
433 Thomassin, et al., 2015), therefore, we used circular dichroism spectroscopy to determine the  
434 secondary structure of these AMPs (Fig. 5C). Under our experimental conditions, only LL-37  
435 is  $\alpha$ -helical, while mCRAMP, C18G and Magainin II are unstructured (Fig. 5C). While  
436 peptide structure did not affect OmpT activity, ArlC did not appear to cleave the only  $\alpha$ -  
437 helical AMP (Fig. 5BC). Together these findings suggest that OmpT, OmpP and ArlC have  
438 differences in substrate cleavage specificities.

439

440 We previously reported that disulfide bonds present in defensins render them resistant to  
441 OmpT-mediated proteolysis (Thomassin, Brannon, Kaiser, et al., 2012). Yet ArlC was shown  
442 to contribute to bacterial survival in the presence of human defensins (McPhee et al., 2014),

443 suggesting that unlike OmpT, ArlC might cleave AMPs that are stabilized by disulfide  
444 bridges. RNase 7 contains four disulfide bridges, three dibasic sites (Fig. 6A) and is abundant  
445 in the urinary tract (Spencer et al., 2011; Spencer et al., 2013). The presence of dibasic sites  
446 suggests that RNase 7 might be an omptin substrate; therefore, we sought to investigate if  
447 there was a difference in omptin-mediated cleavage of this peptide. Under our experimental  
448 conditions, OmpT and OmpP did not cleave RNase 7 (Fig. 6B). After 60 min incubation with  
449 ArlC, an RNase 7 cleavage product appeared, with more cleavage product appearing after 90  
450 min. While cleavage appears limited, ArlC was the only OmpT-like omptin able to cleave  
451 RNase 7. Taken together, these data indicate that ArlC, OmpP, and OmpT have different  
452 substrate specificities, suggesting that the presence of multiple omptin proteases in a single  
453 bacterial strain may enhance AMP-resistance by increasing the range of substrates cleaved.

## 454 **4 DISCUSSION**

455 Detection of specific genes, including *ompT*, is often used to characterize virulent clinical  
456 UPEC isolates (Johnson et al., 2001; Najafi et al., 2018). Previous studies have suggested that  
457 OmpT from the UPEC strain CFT073 is involved in adhesion, invasion and/or inactivation of  
458 AMPs (Brannon et al., 2013; He et al., 2015). While the presence of *ompT* is associated with  
459 virulent strains, its precise contribution remains unclear, as UPEC clinical isolates have highly  
460 variable genetic sequences (Schreiber et al., 2017). In addition, we previously observed large  
461 differences in OmpT protein activity due to differential *ompT* expression (Thomassin,  
462 Brannon, Gibbs, et al., 2012; Thomassin, Brannon, Kaiser, et al., 2012) suggesting that the  
463 presence of the *ompT* gene may not entirely correlate with its activity levels in different  
464 UPEC clinical isolates. In this study we hypothesized that OmpT activity correlates with  
465 increased disease severity among UPEC clinical isolates. To test this hypothesis, we  
466 systematically measured omptin activity in 58 *E. coli* isolates representing colonization and a  
467 range of clinical outcomes. Increased omptin activity was correlated with clinical UPEC  
468 strains isolated from patients with symptomatic UTIs (UTI and sepsis groups).

469

470 Omptin activity was heterogeneous among the clinical isolates, and could be related with  
471 differential *ompT* expression and the presence of a second OmpT-like protease, *arlC*. For  
472 example, a 20-fold difference in *ompT* expression was observed between isolates 5 and 11 of  
473 the UTI group (Fig. 2B). This finding is not unprecedented, since it was previously shown  
474 that *ompT* expression was 32-fold higher in EHEC than in EPEC (Thomassin, Brannon,  
475 Gibbs, et al., 2012). Differential *ompT* expression-levels in EHEC and EPEC were attributed  
476 to differences in distal promoter sequences found more than 150 bp upstream of the *ompT*  
477 start codon (Thomassin, Brannon, Gibbs, et al., 2012). An EPEC-like *ompT* distal promoter  
478 sequence and genomic context was also correlated with low OmpT activity in UPEC

479 reference strains (Brannon et al., 2013). Therefore, it was not surprising that the EPEC-like  
480 promoter in cystitis (UTI) isolate 11 resulted in low *ompT* expression and OmpT activity. The  
481 insertion of *envY* in the intergenic space between *nfrA* and *ompT* correlated with the increased  
482 *ompT* expression and OmpT activity levels observed in cystitis (UTI) isolates 1 and 6 (Figs.  
483 2BC and 3A). These data further suggest that variations in distal promoter sequences are  
484 responsible for differential *ompT* expression and, in turn, proteolytic activity observed. It is  
485 also possible that in addition to differences in the promoter regions, transcription factors or  
486 post-transcriptional factors regulating *ompT* expression are absent or differentially expressed  
487 in some isolates. Another explanation for heterogeneous omptin activity observed in this  
488 study can be attributed to the presence of a second plasmid-encoded omptin, *arlC*, in some  
489 isolates. The *arlC* gene was first identified as part of a large virulence plasmid of the AIEC  
490 strain NRG857c (McPhee et al., 2014). BLAST searches in the NCBI database revealed that  
491 *arlC* can also be found on plasmids harboured by various human ExPEC strains isolated from  
492 patients with meningitis and sepsis, as well as avian *E. coli* strains (Appendix Fig. 2B). While  
493 we did not detect *ompP* in our study, *ompP* is present in some UPEC strains that were  
494 collected and sequenced by the Broad Institute ("E.coli UTI Bacteremia initiative," 2019).  
495 This opens the possibility that any combination of *ompT*-like omptin may be present in a  
496 given UPEC strain.

497  
498 Omptins belonging to the OmpT-like subfamily are known to have subtle differences in  
499 substrate specificity (Brannon, Thomassin, et al., 2015; Hwang et al., 2007; McCarter et al.,  
500 2004). Studies using peptide libraries to compare OmpP and OmpT activity showed both  
501 omptins preferentially cleave substrates between two consecutive basic residues, but that  
502 OmpP appears to have a slight preference for Lys in the P and P' sites (Hwang et al., 2007).  
503 In addition to subtle differences in amino acid motif preference, peptide size and secondary

504 structure also impact substrate specificity (Brannon, Thomassin, et al., 2015; Haiko et al.,  
505 2009; Hritonenko & Stathopoulos, 2007). For example, AMP  $\alpha$ -helicity was shown to be a  
506 determining factor for proteolytic activity of the OmpT-like omptin, CroP, from *Citrobacter*  
507 *rodentium* (Brannon, Thomassin, et al., 2015). While ArlC, OmpP and OmpP all readily  
508 cleave small unstructured substrates, such as the FRET substrate and C18G, differences in  
509 cleavage efficiency were noted for larger or more structured AMPs. OmpP did not cleave  
510 Magainin II as efficiently as C18G and did not cleave larger substrates such as mCRAMP,  
511 LL-37 and RNase 7 (Figs. 4A, 5AB, 6B). These findings suggest that larger peptides might be  
512 excluded from the OmpP active site. While OmpT and ArlC cleaved the FRET substrate,  
513 C18G, Magainin II and mCRAMP relatively efficiently, there was a striking difference in LL-  
514 37 and RNase 7 cleavage (Figs. 4A, 5A, 6B). Given the similarity in size of mCRAMP and  
515 LL-37, and the ability of ArlC to cleave RNase 7, it is unlikely that the 3 amino acid size  
516 difference accounts for the marked difference in cleavage efficiency. It is possible that ArlC  
517 does not cleave  $\alpha$ -helical AMPs, but instead cleaves unstructured and disulfide bond-  
518 stabilized peptides. While this possibility requires further study, it is supported by the finding  
519 that an *arlC* deletion strain is more susceptible to killing by human defensins (McPhee et al.,  
520 2014). Altogether, these findings suggest the presence ArlC and OmpT in the same UPEC  
521 isolate may confer a fitness advantage by expanding the spectrum of target substrates.

522

## 523 **5 Conclusions**

524 Here we show that increased omptin activity is associated with UPEC strains causing  
525 symptomatic UTIs. Extensive heterogeneity of omptin activity among UPEC clinical isolates  
526 was is due to variations in *ompT* expression and to the presence of a plasmid-encoded *ompT*-  
527 like gene *arlC*. Our findings support current profiling practices of UPEC strains that include  
528 the *ompT* gene (Johnson & Stell, 2000), but suggest that additional screening for *arlC* should  
529 be considered as both genes were exclusively harboured in UPEC strains associated with  
530 symptomatic infection. Altogether our findings suggest that the presence of two different  
531 omptins in a UPEC strain may provide an additional fitness advantage by expanding the range  
532 of AMPs cleaved during UTIs.

533

## 534 **Acknowledgements**

535 This work was supported by the Canadian Institutes of Health Research (CIHR, MOP-15551),  
536 the Natural Sciences and Engineering Research Council (NSERC, RGPIN-217482) and the  
537 Fonds de Recherche Québec - Nature et Technologies (FRQNT 2013-PR-165926). ID was  
538 supported by the Fonds de Recherche Québec - Santé (FRQS). JLT was supported by a Hugh  
539 Burke fellowship from the McGill Faculty of Medicine. JLT is supported by a NSERC  
540 postdoctoral fellowship and Pasteur-Roux fellowship. JAT and GTM were supported by the  
541 Canadian Institutes of Health Research (CIHR, MOP-125998). We thank Dr. Mario Jacques  
542 and Mr. Frédéric Berthiaume (Faculté de Médecine Vétérinaire, Université de Montréal) for  
543 providing access to the Jasco J-810 spectropolarimeter and technical assistance with CD  
544 experiments. We thank Dr. Selena Sagan for the gift of labeling reagents for Southern  
545 hybridization. We thank Drs. Olivera Francetic and Yannick Tremblay for helpful comments  
546 and suggestions.

547



548 **Conflict of Interest**

549 The authors have declared that no conflict of interest exists.

550

551 **Author contributions**

552 AP, ID, JAT, JLT, JML, and JRB performed experiments. AM, GTM, HLM, ID, JDS, JLT,

553 KD, and SG conceived and designed experiments. HLM, ID, JLT, and SG analyzed the data.

554 HLM and ID wrote early drafts of the manuscript. JLT wrote and reviewed later drafts with

555 support from all other authors.

556

557 **Dedication**

558 This publication is dedicated to Dr. Hervé LeMoual who passed away on March 3rd 2018; he

559 was a great mentor that always encouraged his trainees to follow their passions.

560

561 **Ethics statement**

562 None required.

563

564 **References**

565

566 Aslam, M., Toufeer, M., Narvaez Bravo, C., Lai, V., Rempel, H., Manges, A., & Diarra, M. S.  
567 (2014). Characterization of Extraintestinal Pathogenic *Escherichia coli* isolated from  
568 retail poultry meats from Alberta, Canada. *Int J Food Microbiol*, 177, 49-56.  
569 doi:10.1016/j.ijfoodmicro.2014.02.006

570 Brannon, J. R., Burk, D. L., Leclerc, J. M., Thomassin, J. L., Portt, A., Berghuis, A. M., . . .  
571 Le Moual, H. (2015). Inhibition of outer membrane proteases of the ompT family by  
572 aprotinin. *Infect Immun*, 83(6), 2300-2311. doi:10.1128/IAI.00136-15

573 Brannon, J. R., Thomassin, J. L., Desloges, I., Gruenheid, S., & Le Moual, H. (2013). Role of  
574 uropathogenic *Escherichia coli* OmpT in the resistance against human cathelicidin  
575 LL-37. *FEMS Microbiol Lett*, 345(1), 64-71. doi:10.1111/1574-6968.12185

576 Brannon, J. R., Thomassin, J. L., Gruenheid, S., & Le Moual, H. (2015). Antimicrobial  
577 Peptide Conformation as a Structural Determinant of OmpT Protease Specificity. *J*  
578 *Bacteriol*, 197(22), 3583-3591. doi:10.1128/JB.00469-15

579 Chromek, M., & Brauner, A. (2008). Antimicrobial mechanisms of the urinary tract. *J Mol*  
580 *Med*, 86(1), 37-47. doi:10.1007/s00109-007-0256-4

581 Chromek, M., Slamova, Z., Bergman, P., Kovacs, L., Podracka, L., Ehren, I., . . . Brauner, A.  
582 (2006). The antimicrobial peptide cathelicidin protects the urinary tract against  
583 invasive bacterial infection. *Nat Med*, 12(6), 636-641. doi:10.1038/nm1407

584 Clermont, O., Bonacorsi, S., & Bingen, E. (2000). Rapid and simple determination of the  
585 *Escherichia coli* phylogenetic group. *Appl Environ Microbiol*, 66(10), 4555-4558.

586 Dekker, N., Cox, R. C., Kramer, R. A., & Egmond, M. R. (2001). Substrate specificity of the  
587 integral membrane protease OmpT determined by spatially addressed peptide libraries.  
588 *Biochemistry*, 40(6), 1694-1701.

589 *E. coli* UTI Bacteremia initiative. (2019). [www.broadinstitute.org](http://www.broadinstitute.org)

590 Flores-Mireles, A. L., Walker, J. N., Caparon, M., & Hultgren, S. J. (2015). Urinary tract  
591 infections: epidemiology, mechanisms of infection and treatment options. *Nat Rev*  
592 *Microbiol*, 13(5), 269-284. doi:10.1038/nrmicro3432

593 Foxman, B. (2014). Urinary tract infection syndromes: occurrence, recurrence, bacteriology,  
594 risk factors, and disease burden. *Infect Dis Clin North Am*, 28(1), 1-13.  
595 doi:10.1016/j.idc.2013.09.003

- 596 Foxman, B., Zhang, L., Palin, K., Tallman, P., & Marrs, C. F. (1995). Bacterial virulence  
597 characteristics of *Escherichia coli* isolates from first-time urinary tract infection. *J*  
598 *Infect Dis*, *171*(6), 1514-1521.
- 599 Gruenheid, S., & Le Moual, H. (2012). Resistance to antimicrobial peptides in Gram-negative  
600 bacteria. *FEMS Microbiol Lett*, *330*(2), 81-89. doi:10.1111/j.1574-6968.2012.02528.x
- 601 Haiko, J., Suomalainen, M., Ojala, T., Lahteenmaki, K., & Korhonen, T. K. (2009). Invited  
602 review: Breaking barriers--attack on innate immune defences by omptin surface  
603 proteases of enterobacterial pathogens. *Innate Immun*, *15*(2), 67-80.  
604 doi:10.1177/1753425909102559
- 605 He, X. L., Wang, Q., Peng, L., Qu, Y. R., Puthiyakunnon, S., Liu, X. L., . . . Huang, S. H.  
606 (2015). Role of uropathogenic *Escherichia coli* outer membrane protein T in  
607 pathogenesis of urinary tract infection. *Pathog Dis*, *73*(3). doi:10.1093/femspd/ftv006
- 608 Hooton, T. M. (2012). Clinical practice. Uncomplicated urinary tract infection. *N Engl J Med*,  
609 *366*(11), 1028-1037. doi:10.1056/NEJMcp1104429
- 610 Hooton, T. M., & Stamm, W. E. (1997). Diagnosis and treatment of uncomplicated urinary  
611 tract infection. *Infect Dis Clin North Am*, *11*(3), 551-581.
- 612 Hritonenko, V., & Stathopoulos, C. (2007). Omptin proteins: an expanding family of outer  
613 membrane proteases in Gram-negative Enterobacteriaceae. *Mol Membr Biol*, *24*(5-6),  
614 395-406. doi:10.1080/09687680701443822
- 615 Hwang, B. Y., Varadarajan, N., Li, H., Rodriguez, S., Iverson, B. L., & Georgiou, G. (2007).  
616 Substrate specificity of the *Escherichia coli* outer membrane protease OmpP. *J*  
617 *Bacteriol*, *189*(2), 522-530. doi:10.1128/JB.01493-06
- 618 Jensen, H., Hamill, P., & Hancock, R. E. (2006). Peptide antimicrobial agents. *Clin*  
619 *Microbiol Rev*, *19*(3), 491-511. doi:10.1128/CMR.00056-05
- 620 Johnson, J. R. (1991). Virulence factors in *Escherichia coli* urinary tract infection. *Clin*  
621 *Microbiol Rev*, *4*(1), 80-128.
- 622 Johnson, J. R., Delavari, P., Kuskowski, M., & Stell, A. L. (2001). Phylogenetic distribution  
623 of extraintestinal virulence-associated traits in *Escherichia coli*. *J Infect Dis*, *183*(1),  
624 78-88. doi:10.1086/317656
- 625 Johnson, J. R., & Stell, A. L. (2000). Extended virulence genotypes of *Escherichia coli* strains  
626 from patients with urosepsis in relation to phylogeny and host compromise. *J Infect*  
627 *Dis*, *181*(1), 261-272. doi:10.1086/315217
- 628 Kai-Larsen, Y., Luthje, P., Chromek, M., Peters, V., Wang, X., Holm, A., . . . Brauner, A.  
629 (2010). Uropathogenic *Escherichia coli* modulates immune responses and its curli

- 630 fimbriae interact with the antimicrobial peptide LL-37. *PLoS Pathog*, 6(7), e1001010.  
631 doi:10.1371/journal.ppat.1001010
- 632 Kaper, J. B., Nataro, J. P., & Mobley, H. L. (2004). Pathogenic *Escherichia coli*. *Nat Rev*  
633 *Microbiol*, 2(2), 123-140. doi:10.1038/nrmicro818
- 634 Kaufmann, A., Stierhof, Y. D., & Henning, U. (1994). New outer membrane-associated  
635 protease of *Escherichia coli* K-12. *J Bacteriol*, 176(2), 359-367.
- 636 Kjolvmak, C., Akesson, P., & Pahlman, L. I. (2017). Urine concentrations of human beta-  
637 defensins and ribonuclease 7 in urinary tract infection and asymptomatic bacteriuria.  
638 *Diagn Microbiol Infect Dis*, 89(1), 58-60. doi:10.1016/j.diagmicrobio.2017.06.010
- 639 Kramer, R. A., Vandeputte-Rutten, L., de Roon, G. J., Gros, P., Dekker, N., & Egmond, M. R.  
640 (2001). Identification of essential acidic residues of outer membrane protease OmpT  
641 supports a novel active site. *FEBS Lett*, 505(3), 426-430.
- 642 Kramer, R. A., Zandwijken, D., Egmond, M. R., & Dekker, N. (2000). In vitro folding,  
643 purification and characterization of *Escherichia coli* outer membrane protease ompT.  
644 *Eur J Biochem*, 267(3), 885-893.
- 645 Kukkonen, M., Lahteenmaki, K., Suomalainen, M., Kalkkinen, N., Emody, L., Lang, H., &  
646 Korhonen, T. K. (2001). Protein regions important for plasminogen activation and  
647 inactivation of alpha2-antiplasmin in the surface protease Pla of *Yersinia pestis*. *Mol*  
648 *Microbiol*, 40(5), 1097-1111.
- 649 Lathem, W. W., Price, P. A., Miller, V. L., & Goldman, W. E. (2007). A plasminogen-  
650 activating protease specifically controls the development of primary pneumonic  
651 plague. *Science*, 315(5811), 509-513. doi:10.1126/science.1137195
- 652 Le Sage, V., Zhu, L., Lepage, C., Portt, A., Viau, C., Daigle, F., . . . Le Moual, H. (2009). An  
653 outer membrane protease of the omptin family prevents activation of the *Citrobacter*  
654 *rodentium* PhoPQ two-component system by antimicrobial peptides. *Mol Microbiol*,  
655 74(1), 98-111. doi:10.1111/j.1365-2958.2009.06854.x
- 656 Lehmann, J., Retz, M., Harder, J., Krams, M., Kellner, U., Hartmann, J., . . . Stockle, M.  
657 (2002). Expression of human beta-defensins 1 and 2 in kidneys with chronic bacterial  
658 infection. *BMC Infect Dis*, 2, 20.
- 659 Livak, K. J., & Schmittgen, T. D. (2001). Analysis of relative gene expression data using real-  
660 time quantitative PCR and the 2(-Delta Delta C(T)) Method. *Methods*, 25(4), 402-408.  
661 doi:10.1006/meth.2001.1262

- 662 Lloyd, A. L., Rasko, D. A., & Mobley, H. L. (2007). Defining genomic islands and  
663 uropathogen-specific genes in uropathogenic *Escherichia coli*. *J Bacteriol*, *189*(9),  
664 3532-3546. doi:10.1128/JB.01744-06
- 665 Manges, A. R., Dietrich, P. S., & Riley, L. W. (2004). Multidrug-resistant *Escherichia coli*  
666 clonal groups causing community-acquired pyelonephritis. *Clin Infect Dis*, *38*(3), 329-  
667 334. doi:10.1086/380640
- 668 Manges, A. R., Johnson, J. R., Foxman, B., O'Bryan, T. T., Fullerton, K. E., & Riley, L. W.  
669 (2001). Widespread distribution of urinary tract infections caused by a multidrug-  
670 resistant *Escherichia coli* clonal group. *N Engl J Med*, *345*(14), 1007-1013.  
671 doi:10.1056/NEJMoa011265
- 672 Manges, A. R., Johnson, J. R., & Riley, L. W. (2004). Intestinal population dynamics of UTI-  
673 causing *Escherichia coli* within heterosexual couples. *Curr Issues Intest Microbiol*,  
674 *5*(2), 49-57.
- 675 Manges, A. R., Perdreau-Remington, F., Solberg, O., & Riley, L. W. (2006). Multidrug-  
676 resistant *Escherichia coli* clonal groups causing community-acquired bloodstream  
677 infections. *J Infect*, *53*(1), 25-29. doi:10.1016/j.jinf.2005.09.012
- 678 Manges, A. R., Tabor, H., Tellis, P., Vincent, C., & Tellier, P. P. (2008). Endemic and  
679 epidemic lineages of *Escherichia coli* that cause urinary tract infections. *Emerg Infect*  
680 *Dis*, *14*(10), 1575-1583. doi:10.3201/eid1410.080102
- 681 Marschall, J., Zhang, L., Foxman, B., Warren, D. K., Henderson, J. P., & Program, C. D. C.  
682 P. E. (2012). Both host and pathogen factors predispose to *Escherichia coli* urinary-  
683 source bacteremia in hospitalized patients. *Clin Infect Dis*, *54*(12), 1692-1698.  
684 doi:10.1093/cid/cis252
- 685 Maynard, C., Bekal, S., Sanschagrin, F., Levesque, R. C., Brousseau, R., Masson, L., . . .  
686 Harel, J. (2004). Heterogeneity among virulence and antimicrobial resistance gene  
687 profiles of extraintestinal *Escherichia coli* isolates of animal and human origin. *J Clin*  
688 *Microbiol*, *42*(12), 5444-5452. doi:10.1128/JCM.42.12.5444-5452.2004
- 689 McCarter, J. D., Stephens, D., Shoemaker, K., Rosenberg, S., Kirsch, J. F., & Georgiou, G.  
690 (2004). Substrate specificity of the *Escherichia coli* outer membrane protease OmpT. *J*  
691 *Bacteriol*, *186*(17), 5919-5925. doi:10.1128/JB.186.17.5919-5925.2004
- 692 McPhee, J. B., Small, C. L., Reid-Yu, S. A., Brannon, J. R., Le Moual, H., & Coombes, B. K.  
693 (2014). Host defense peptide resistance contributes to colonization and maximal  
694 intestinal pathology by Crohn's disease-associated adherent-invasive *Escherichia coli*.  
695 *Infect Immun*, *82*(8), 3383-3393. doi:10.1128/IAI.01888-14

- 696 Mobley, H. L., Green, D. M., Trifillis, A. L., Johnson, D. E., Chippendale, G. R., Lockett,  
697 C. V., . . . Warren, J. W. (1990). Pyelonephritogenic *Escherichia coli* and killing of  
698 cultured human renal proximal tubular epithelial cells: role of hemolysin in some  
699 strains. *Infect Immun*, 58(5), 1281-1289.
- 700 Moreno, E., Andreu, A., Perez, T., Sabate, M., Johnson, J. R., & Prats, G. (2006).  
701 Relationship between *Escherichia coli* strains causing urinary tract infection in women  
702 and the dominant faecal flora of the same hosts. *Epidemiol Infect*, 134(5), 1015-1023.  
703 doi:10.1017/S0950268806005917
- 704 Najafi, A., Hasanpour, M., Askary, A., Aziemzadeh, M., & Hashemi, N. (2018). Distribution  
705 of pathogenicity island markers and virulence factors in new phylogenetic groups of  
706 uropathogenic *Escherichia coli* isolates. *Folia Microbiol (Praha)*, 63(3), 335-343.  
707 doi:10.1007/s12223-017-0570-3
- 708 Nielsen, K. L., Dynesen, P., Larsen, P., Jakobsen, L., Andersen, P. S., & Frimodt-Moller, N.  
709 (2014). Role of urinary cathelicidin LL-37 and human beta-defensin 1 in  
710 uncomplicated *Escherichia coli* urinary tract infections. *Infect Immun*, 82(4), 1572-  
711 1578. doi:10.1128/IAI.01393-13
- 712 Nielubowicz, G. R., & Mobley, H. L. (2010). Host-pathogen interactions in urinary tract  
713 infection. *Nat Rev Urol*, 7(8), 430-441. doi:10.1038/nrurol.2010.101
- 714 Norinder, B. S., Koves, B., Yadav, M., Brauner, A., & Svanborg, C. (2012). Do *Escherichia*  
715 *coli* strains causing acute cystitis have a distinct virulence repertoire? *Microb Pathog*,  
716 52(1), 10-16. doi:10.1016/j.micpath.2011.08.005
- 717 Poey, M. E., Albin, M., Saona, G., & Lavina, M. (2012). Virulence profiles in uropathogenic  
718 *Escherichia coli* isolated from pregnant women and children with urinary tract  
719 abnormalities. *Microb Pathog*, 52(5), 292-301. doi:10.1016/j.micpath.2012.02.006
- 720 Schreiber, H. L. t., Conover, M. S., Chou, W. C., Hibbing, M. E., Manson, A. L., Dodson, K.  
721 W., . . . Hultgren, S. J. (2017). Bacterial virulence phenotypes of *Escherichia coli* and  
722 host susceptibility determine risk for urinary tract infections. *Sci Transl Med*, 9(382).  
723 doi:10.1126/scitranslmed.aaf1283
- 724 Schwab, S., Jobin, K., & Kurts, C. (2017). Urinary tract infection: recent insight into the  
725 evolutionary arms race between uropathogenic *Escherichia coli* and our immune  
726 system. *Nephrol Dial Transplant*, 32(12), 1977-1983. doi:10.1093/ndt/gfx022
- 727 Sodeinde, O. A., Subrahmanyam, Y. V., Stark, K., Quan, T., Bao, Y., & Goguen, J. D.  
728 (1992). A surface protease and the invasive character of plague. *Science*, 258(5084),  
729 1004-1007.

- 730 Spencer, J. D., Hains, D. S., Porter, E., Bevins, C. L., DiRosario, J., Becknell, B., . . .  
731 Schwaderer, A. L. (2012). Human alpha defensin 5 expression in the human kidney  
732 and urinary tract. *PLoS One*, *7*(2), e31712. doi:10.1371/journal.pone.0031712
- 733 Spencer, J. D., Schwaderer, A. L., Becknell, B., Watson, J., & Hains, D. S. (2014). The innate  
734 immune response during urinary tract infection and pyelonephritis. *Pediatr Nephrol*,  
735 *29*(7), 1139-1149. doi:10.1007/s00467-013-2513-9
- 736 Spencer, J. D., Schwaderer, A. L., Dirosario, J. D., McHugh, K. M., McGillivray, G., Justice,  
737 S. S., . . . Hains, D. S. (2011). Ribonuclease 7 is a potent antimicrobial peptide within  
738 the human urinary tract. *Kidney Int*, *80*(2), 174-180. doi:10.1038/ki.2011.109
- 739 Spencer, J. D., Schwaderer, A. L., Wang, H., Bartz, J., Kline, J., Eichler, T., . . . Hains, D. S.  
740 (2013). Ribonuclease 7, an antimicrobial peptide upregulated during infection,  
741 contributes to microbial defense of the human urinary tract. *Kidney Int*, *83*(4), 615-  
742 625. doi:10.1038/ki.2012.410
- 743 Stumpe, S., Schmid, R., Stephens, D. L., Georgiou, G., & Bakker, E. P. (1998). Identification  
744 of OmpT as the protease that hydrolyzes the antimicrobial peptide protamine before it  
745 enters growing cells of *Escherichia coli*. *J Bacteriol*, *180*(15), 4002-4006.
- 746 Taylor, J. A., Ouimet, M. C., Wargachuk, R., & Marczyński, G. T. (2011). The *Caulobacter*  
747 *crescentus* chromosome replication origin evolved two classes of weak DnaA binding  
748 sites. *Mol Microbiol*, *82*(2), 312-326. doi:10.1111/j.1365-2958.2011.07785.x
- 749 Terlizzi, M. E., Gribaudo, G., & Maffei, M. E. (2017). UroPathogenic *Escherichia coli*  
750 (UPEC) Infections: Virulence Factors, Bladder Responses, Antibiotic, and Non-  
751 antibiotic Antimicrobial Strategies. *Front Microbiol*, *8*, 1566.  
752 doi:10.3389/fmicb.2017.01566
- 753 Thomas, N. A., Deng, W., Puente, J. L., Frey, E. A., Yip, C. K., Strynadka, N. C., & Finlay,  
754 B. B. (2005). CesT is a multi-effector chaperone and recruitment factor required for  
755 the efficient type III secretion of both LEE- and non-LEE-encoded effectors of  
756 enteropathogenic *Escherichia coli*. *Mol Microbiol*, *57*(6), 1762-1779.  
757 doi:10.1111/j.1365-2958.2005.04802.x
- 758 Thomassin, J. L., Brannon, J. R., Gibbs, B. F., Gruenheid, S., & Le Moual, H. (2012). OmpT  
759 outer membrane proteases of enterohemorrhagic and enteropathogenic *Escherichia*  
760 *coli* contribute differently to the degradation of human LL-37. *Infect Immun*, *80*(2),  
761 483-492. doi:10.1128/IAI.05674-11

- 762 Thomassin, J. L., Brannon, J. R., Kaiser, J., Gruenheid, S., & Le Moual, H. (2012).  
763 Enterohemorrhagic and enteropathogenic *Escherichia coli* evolved different strategies  
764 to resist antimicrobial peptides. *Gut Microbes*, 3(6), 556-561. doi:10.4161/gmic.21656
- 765 Valore, E. V., Park, C. H., Quayle, A. J., Wiles, K. R., McCray, P. B., Jr., & Ganz, T. (1998).  
766 Human beta-defensin-1: an antimicrobial peptide of urogenital tissues. *J Clin Invest*,  
767 101(8), 1633-1642. doi:10.1172/JCI11861
- 768 Vandeputte-Rutten, L., Kramer, R. A., Kroon, J., Dekker, N., Egmond, M. R., & Gros, P.  
769 (2001). Crystal structure of the outer membrane protease OmpT from *Escherichia coli*  
770 suggests a novel catalytic site. *EMBO J*, 20(18), 5033-5039.  
771 doi:10.1093/emboj/20.18.5033
- 772 Wang, R. F., & Kushner, S. R. (1991). Construction of versatile low-copy-number vectors for  
773 cloning, sequencing and gene expression in *Escherichia coli*. *Gene*, 100, 195-199.
- 774 Weichhart, T., Haidinger, M., Horl, W. H., & Saemann, M. D. (2008). Current concepts of  
775 molecular defence mechanisms operative during urinary tract infection. *Eur J Clin*  
776 *Invest*, 38 Suppl 2, 29-38. doi:10.1111/j.1365-2362.2008.02006.x
- 777 Zasloff, M. (2007). Antimicrobial peptides, innate immunity, and the normally sterile urinary  
778 tract. *J Am Soc Nephrol*, 18(11), 2810-2816. doi:10.1681/ASN.2007050611
- 779 Zhuge, X., Sun, Y., Xue, F., Tang, F., Ren, J., Li, D., . . . Dai, J. (2018). A Novel PhoP/PhoQ  
780 Regulation Pathway Modulates the Survival of Extraintestinal Pathogenic *Escherichia*  
781 *coli* in Macrophages. *Front Immunol*, 9, 788. doi:10.3389/fimmu.2018.00788
- 782 Zimble, D. L., Schroeder, J. A., Eddy, J. L., & Lathem, W. W. (2015). Early emergence of  
783 *Yersinia pestis* as a severe respiratory pathogen. *Nat Commun*, 6, 7487.  
784 doi:10.1038/ncomms8487
- 785
- 786



**Table 1.** Strains and plasmids used in this study

| Strains   | Description                                                                                                                                                                            | Source                          |
|-----------|----------------------------------------------------------------------------------------------------------------------------------------------------------------------------------------|---------------------------------|
| XL1-Blue  | <i>endA1 gyrA96(nal<sup>R</sup>) thi-1 recA1 relA1 lac glnV44 F'[::Tn10] proAB<sup>+</sup> lacI<sup>q</sup> Δ(lacZ)M15] hsdR17(r<sub>K</sub><sup>-</sup>m<sub>K</sub><sup>+</sup>)</i> | Stratagene                      |
| GMS 002A  | O11:NM; coded as Fecal 1                                                                                                                                                               | (Aslam et al., 2014)            |
| GMS 003A  | Coded as Fecal 2                                                                                                                                                                       | Manges strain collection        |
| GMS 005A  | Coded as Fecal 3                                                                                                                                                                       | Manges strain collection        |
| GMS 006E  | Coded as Fecal 4                                                                                                                                                                       | Manges strain collection        |
| GMS 008A  | Coded as Fecal 5                                                                                                                                                                       | Manges strain collection        |
| GMS 009B  | Coded as Fecal 6                                                                                                                                                                       | (Aslam et al., 2014)            |
| GMS 010A  | Coded as Fecal 7                                                                                                                                                                       | Manges strain collection        |
| GMS 012A  | Coded as Fecal 8                                                                                                                                                                       | Manges strain collection        |
| GMS 015A  | Coded as Fecal 9                                                                                                                                                                       | Manges strain collection        |
| GMS 016D  | Coded as Fecal 10                                                                                                                                                                      | Manges strain collection        |
| GMS 017A  | Coded as Fecal 11                                                                                                                                                                      | Manges strain collection        |
| GMS 018A  | Coded as Fecal 12                                                                                                                                                                      | Manges strain collection        |
| 10001U001 | Coded as asymptomatic bacteriuria 1                                                                                                                                                    | (Manges, Johnson, et al., 2004) |
| 10003U002 | Coded as asymptomatic bacteriuria 2                                                                                                                                                    | (Manges, Johnson, et al., 2004) |
| 10004U001 | Coded as asymptomatic bacteriuria 3                                                                                                                                                    | (Manges, Johnson, et al., 2004) |
| 10013U005 | Coded as asymptomatic bacteriuria 4                                                                                                                                                    | (Manges, Johnson, et al., 2004) |
| 10014U005 | Coded as asymptomatic bacteriuria 5                                                                                                                                                    | (Manges, Johnson, et al., 2004) |
| 10017U005 | Coded as asymptomatic bacteriuria 6                                                                                                                                                    | (Manges, Johnson, et al., 2004) |
| 1001006   | Coded as asymptomatic bacteriuria 7                                                                                                                                                    | (Manges, Johnson, et al., 2004) |
| 10005004  | Coded as asymptomatic bacteriuria 8                                                                                                                                                    | (Manges, Johnson, et al., 2004) |

|            |                                                                       |                                  |
|------------|-----------------------------------------------------------------------|----------------------------------|
|            |                                                                       | 2004)                            |
| 10006001   | Coded as asymptomatic bacteriuria 9                                   | (Manges, Johnson, et al., 2004)  |
| 10012007   | Coded as asymptomatic bacteriuria 10                                  | (Manges, Johnson, et al., 2004)  |
| CLSC 36    | O1:H42; isolated from a patient with cystitis; coded as UTI 1         | (Manges et al., 2008)            |
| MSHS 100   | O2:H7; isolated from a patient with cystitis; coded as UTI 2          | (Manges et al., 2008)            |
| MSHS 1070  | Isolated from a patient with cystitis; coded as UTI 3                 | (Manges et al., 2008)            |
| MSHS 233   | O9:H32; isolated from a patient with cystitis; coded as UTI 4         | (Manges et al., 2008)            |
| MSHS 434   | O73:H18; isolated from a patient with cystitis; coded as UTI 5        | (Manges et al., 2008)            |
| MSHS 472   | O82:NM; isolated from a patient with cystitis; coded as UTI 6         | (Manges et al., 2008)            |
| MSHS 635   | Isolated from a patient with cystitis; coded as UTI 7                 | (Manges et al., 2008)            |
| MSHS 637   | Isolated from a patient with cystitis; coded as UTI 8                 | (Manges et al., 2008)            |
| MSHS 689   | Isolated from a patient with cystitis; coded as UTI 9                 | (Manges et al., 2008)            |
| MSHS 415   | O6:H1; isolated from a patient with cystitis; coded as UTI 10         | (Manges et al., 2008)            |
| MSHS 133   | O24:NM; isolated from a patient with cystitis; coded as UTI 11        | (Manges et al., 2008)            |
| MSHS 769   | O4:H5; isolated from a patient with cystitis; coded as UTI 12         | (Manges et al., 2008)            |
| UTI PI 486 | O11:Neg; isolated from a patient with pyelonephritis; coded as UTI 13 | (Manges, Dietrich, et al., 2004) |
| UTI PI 141 | X19; isolated from a patient with pyelonephritis; coded as UTI 14     | (Manges, Dietrich, et al., 2004) |

|            |                                                                   |                                  |
|------------|-------------------------------------------------------------------|----------------------------------|
| UTI PI 147 | Isolated from a patient with cystitis; coded as UTI 15            | (Manges, Dietrich, et al., 2004) |
| UTI PI 192 | Isolated from a patient with cystitis; coded as UTI 16            | (Manges, Dietrich, et al., 2004) |
| UTI PI 240 | Isolated from a patient with cystitis; coded as UTI 17            | (Manges, Dietrich, et al., 2004) |
| UTI PI 247 | Isolated from a patient with cystitis; coded as UTI 18            | (Manges, Dietrich, et al., 2004) |
| UTI PI 259 | Isolated from a patient with cystitis; coded as UTI 19            | (Manges, Dietrich, et al., 2004) |
| UTI PI 268 | Isolated from a patient with cystitis; coded as UTI 20            | (Manges, Dietrich, et al., 2004) |
| UTI PI 280 | Isolated from a patient with cystitis; coded as UTI 21            | (Manges, Dietrich, et al., 2004) |
| UTI PI 374 | O18; isolated from a patient with cystitis; coded as UTI 22       | (Manges, Dietrich, et al., 2004) |
| UTI PI 20  | isolated from a patient with cystitis; coded as UTI 23            | (Manges, Dietrich, et al., 2004) |
| UTI PI 116 | isolated from a patient with cystitis; coded as UTI 24            | (Manges, Dietrich, et al., 2004) |
| W26653     | O15; isolated from a patient with sepsis; coded as upper sepsis 1 | (Manges et al., 2006)            |
| W55291     | O77; isolated from a patient with sepsis; coded as sepsis 2       | (Manges et al., 2006)            |
| X19714     | O86; isolated from a patient with sepsis; coded as sepsis 3       | (Manges et al., 2006)            |
| X37350     | O73; isolated from a patient with sepsis; coded as sepsis 4       | (Manges et al., 2006)            |
| X47726     | O11; isolated from a patient with sepsis; coded as sepsis 5       | (Manges et al., 2006)            |
| S49894     | O102; isolated from a patient with sepsis; coded as sepsis 6      | (Manges et al., 2006)            |
| H15        | O153; isolated from a patient with sepsis;                        | (Manges et al., 2006)            |

---

|                             |                                                                                                           |                        |
|-----------------------------|-----------------------------------------------------------------------------------------------------------|------------------------|
|                             | coded as sepsis 7                                                                                         |                        |
| F46700                      | Isolated from a patient with sepsis; coded as sepsis 8                                                    | (Manges et al., 2006)  |
| F55268                      | Isolated from a patient with sepsis; coded as sepsis 9                                                    | (Manges et al., 2006)  |
| M32569                      | Isolated from a patient with sepsis; coded as sepsis 10                                                   | (Manges et al., 2006)  |
| M4026                       | Isolated from a patient with sepsis; coded as sepsis 11                                                   | (Manges et al., 2006)  |
| M49611                      | Isolated from a patient with sepsis; coded as sepsis 12                                                   | (Manges et al., 2006)  |
| CFT073                      | Uropathogenic <i>E. coli</i> O6:K2:H1                                                                     | (Mobley et al., 1990)  |
| CFT073 $\Delta$ <i>ompT</i> | Uropathogenic <i>E. coli</i> O6:K2:H1 $\Delta$ <i>ompT</i>                                                | (Brannon et al., 2013) |
| BL21                        | F <sup>-</sup> <i>dcm ompT hsdS<sub>B</sub> (r<sub>B</sub><sup>-</sup> m<sub>B</sub><sup>-</sup>) gal</i> | Novagen                |
| BL21(pWSK129)               | BL21(DE3) containing plasmid pWSK129                                                                      | This study             |
| BL21( <i>pompT</i> )        | BL21(DE3) expressing <i>ompT</i> from pWSK <i>ompT</i>                                                    | This study             |
| BL21( <i>pompP</i> )        | BL21(DE3) expressing <i>ompP</i> from pWSK <i>ompP</i>                                                    | This study             |
| BL21( <i>parlC</i> )        | BL21(DE3) expressing <i>arlC</i> from pWSK <i>arlC</i>                                                    | This study             |
| BL21( <i>ppla</i> )         | BL21(DE3) expressing <i>Pla</i> from pWSK <i>pla</i>                                                      | This study             |
| Plasmids                    |                                                                                                           |                        |
| pWSK129                     | Low-copy number plasmid (Kan <sup>R</sup> )                                                               | (Wang & Kushner, 1991) |
| pWSK <i>arlC</i>            | <i>arlC</i> from Cys 6 cloned into pWSK129                                                                | This study             |
| pWSK <i>pla</i>             | <i>pla</i> cloned into pWSK129                                                                            | This study             |
| pWSK <i>ompT</i>            | <i>ompT</i> from isolate Cys 6 cloned into pWSK129                                                        | This study             |
| pWSK <i>ompP</i>            | <i>ompP</i> from XL1-Blue cloned into pWSK129                                                             | This study             |

**Table 2. Primers used in this study**

| <b>Name</b> | <b>Sequence 5 – 3'<sup>a</sup></b> | <b>Use</b>    | <b>Source</b>           |
|-------------|------------------------------------|---------------|-------------------------|
| iutA_f      | GGCTGGACATCATGGGAACTGG             | Multiplex PCR | (Johnson & Stell, 2000) |
| iutA_r      | CGTCGGGAACGGGTAGAATCG              | Multiplex PCR | (Johnson & Stell, 2000) |
| fimH_f      | TGCAGAACGGATAAGCCGTGG              | Multiplex PCR | (Johnson & Stell, 2000) |
| fimH_r      | GCAGTCACCTGCCCTCCGGTA              | Multiplex PCR | (Johnson & Stell, 2000) |
| papAH_f     | ATGGCAGTGGTGTCTTTTGGTG             | Multiplex PCR | (Johnson & Stell, 2000) |
| papAH_r     | CGTCCCACCATACGTGCTCTTC             | Multiplex PCR | (Johnson & Stell, 2000) |
| papC_f      | GTGGCAGTATGAGTAATGACCGTTA          | Multiplex PCR | (Johnson & Stell, 2000) |
| papC_r      | ATATCCTTTCTGCAGGGATGCAATA          | Multiplex PCR | (Johnson & Stell, 2000) |
| papEF_f     | GCAACAGCAACGCTGGTTGCATCAT          | Multiplex PCR | (Johnson & Stell, 2000) |
| papEF_r     | AGAGAGAGCCACTCTTATACGGACA          | Multiplex PCR | (Johnson & Stell, 2000) |
| sfaS_f      | GTGGATACGACGATTA ACTGTG            | Multiplex PCR | (Johnson & Stell, 2000) |
| sfaS_r      | CCGCCAGCATTCCCTGTATTC              | Multiplex PCR | (Johnson & Stell, 2000) |

|           |                             |                     |                         |
|-----------|-----------------------------|---------------------|-------------------------|
| fyuA_r    | CGCAGTAGGCACGATGTTGTA       | Multiplex PCR       | (Johnson & Stell, 2000) |
| kpsMII_f  | GCGCATTGCTGATACTGTTG        | Multiplex PCR       | (Johnson & Stell, 2000) |
| kpsMII_r  | CATCCAGACGATAAGCATGAGCA     | Multiplex PCR       | (Johnson & Stell, 2000) |
| kpsMIII_f | TCCTCTTGCTACTATTCCCCCT      | Multiplex PCR       | (Johnson & Stell, 2000) |
| kpsMIII_r | AGGCGTATCCATCCCTCCTAAC      | Multiplex PCR       | (Johnson & Stell, 2000) |
| cnf-1_f   | AAGATGGAGTTTCCTATGCAGGAG    | Multiplex PCR       | (Johnson & Stell, 2000) |
| cnf-1_r   | CATTCAGAGTCCTGCCCTCATTATT   | Multiplex PCR       | (Johnson & Stell, 2000) |
| hlyA_f    | AACAAGGATAAGCACTGTTCTGGCT   | Multiplex PCR       | (Johnson & Stell, 2000) |
| hlyA_r    | ACCATATAAGCGGTCATTCCCGTCA   | Multiplex PCR       | (Johnson & Stell, 2000) |
| ompT_mf   | TTTGATGCCCCAGATATCTATCGG    | Multiplex PCR       | This study              |
| ompT_mr   | GGCTTTCCTGATATCCGGCCATG     | Multiplex PCR       | This study              |
| arIC_mf   | GATTCTTGCTACTGCACTCTCAGCTCC | Multiplex PCR       | This study              |
| arIC_mr   | CTGGAGTACAGAGAAGTATCACC     | Multiplex PCR       | This study              |
| ompP_mf   | TGCTTCTGATTTCTTCGGCC        | Multiplex PCR       | This study              |
| ompP_mr   | GTAGTTTGTCTTACATAATGCTC     | Multiplex PCR       | This study              |
| chuA_f    | GACGAACCAACGGTCAGGAT        | Phylogenetic typing | (Clermont et al., 2000) |

|            |                                       |                     |                         |
|------------|---------------------------------------|---------------------|-------------------------|
| chuA_r     | TGCCGCCAGTACCAAAGACA                  | Phylogenetic typing | (Clermont et al., 2000) |
| yjaA_f     | TGAAGTGTCAGGAGACGCTG                  | Phylogenetic typing | (Clermont et al., 2000) |
| yjaA_r     | ATGGAGAATGCGTTCCTCAAC                 | Phylogenetic typing | (Clermont et al., 2000) |
| TSPE4.C2_f | GAGTAATGTCGGGGCATTCA                  | Phylogenetic typing | (Clermont et al., 2000) |
| TSPE4.C2_r | CGCGCCAACAAAGTATTACG                  | Phylogenetic typing | (Clermont et al., 2000) |
| ompT_cf    | CATGTCTAGACCACGACTTAGAAGTTCCTAGAACG   | Cloning             | This study              |
| ompT_cr    | GCGAGCTCAAATCTGGTTAACTTCGTAA          | Cloning             | This study              |
| ompP_cf    | GCATAGTCTAGATCCTGTAGTTGCGTCAGGCCCTCCA | Cloning             | This study              |
| ompP_cr    | GCATAGCTGCAGTCCGGGTAATCCAGGTCCGCCACT  | Cloning             | This study              |
| arlC_cf    | CATGTCTAGACCCGGCATAAAGTGTCC           | Cloning             | This study              |
| arlC_cr    | CTAGGAGCTCATCGTTGAGCACATATAC          | Cloning             | This study              |
| ompT_sf    | ATGCGGGCGAACTTCTGGGAATAG              | Southern blot probe | This study              |
| ompT_sr    | TCCCAATTAATTGCACCTTTAATAATT           | Southern blot probe | This study              |
| arlC_sf    | GATTCTTGCTACTGCACTCTCAGCTCC           | Southern blot probe | This study              |
| arlC_sr    | CTAGGAGCTCATCGTTGAGCACATATAC          | Southern blot probe | This study              |
| rpoD_qf    | GCTGGAAGAAGTGGGTAAC                   | qPCR                | This study              |

|         |                           |      |                                              |
|---------|---------------------------|------|----------------------------------------------|
| rpoD_qr | TAATCGTCCAGGAAGCTACG      | qPCR | This study                                   |
| ompT_qf | CAGCGGCTGGGTGGAAGCAT      | qPCR | (Thomassin, Brannon,<br>Gibbs, et al., 2012) |
| ompT_qr | ACCCGATTCCATGCGCCTTCA     | qPCR | (Thomassin, Brannon,<br>Gibbs, et al., 2012) |
| arlC_qf | AGGATCACCTATCGTAGCGATGT   | qPCR | This study                                   |
| arlC_qf | CGGTTCCATGTTTCCTTCGACATAA | qPCR | This study                                   |

---

790 <sup>a</sup>Restriction sites are underlined

791

792



793

794

795

**Table 3. Phylogenetic distribution of UPEC clinical isolates.**

|                         | Phylogenetic groups |    |    |    | (B2 + D)/Total |
|-------------------------|---------------------|----|----|----|----------------|
|                         | A                   | B1 | B2 | D  |                |
| Fecal ( <i>n</i> = 12)  | 4                   | 1  | 3  | 4  | 7/12           |
| ABU ( <i>n</i> = 10)    | 2                   | 1  | 5  | 2  | 7/10           |
| UTI ( <i>n</i> = 24)    | 3                   | 3  | 11 | 7  | 18/24          |
| Sepsis ( <i>n</i> = 12) | 0                   | 2  | 0  | 10 | 10/12          |
| Total ( <i>n</i> = 58)  | 9                   | 7  | 19 | 23 | 42/58          |

796

797

| <b>Gene</b>     | <b>Fecal</b><br><b>(n = 12)</b> | <b>ABU</b><br><b>(n = 10)</b> | <b>UTI</b><br><b>(n = 24)</b> | <b>Sepsis</b><br><b>(n = 12)</b> | <b>P value*</b> |
|-----------------|---------------------------------|-------------------------------|-------------------------------|----------------------------------|-----------------|
| <i>iutA</i>     | 1                               | 6                             | 14                            | 12                               | .0541           |
| <i>fimH</i>     | 12                              | 8                             | 24                            | 12                               | .5508           |
| <i>papAH</i>    | 3                               | 6                             | 10                            | 10                               | .4173           |
| <i>papC</i>     | 3                               | 6                             | 12                            | 10                               | .4263           |
| <i>papEF</i>    | 4                               | 7                             | 12                            | 10                               | .4550           |
| <i>sfaS</i>     | 1                               | 1                             | 4                             | 0                                | 1.0000          |
| <i>fyuA</i>     | 9                               | 7                             | 23                            | 11                               | <b>.0435</b>    |
| <i>kspMTII</i>  | 7                               | 7                             | 14                            | 8                                | 1.0000          |
| <i>kspMTIII</i> | 0                               | 0                             | 2                             | 0                                | .5203           |
| <i>cnfI</i>     | 4                               | 4                             | 8                             | 0                                | .3641           |
| <i>hlyA</i>     | 4                               | 3                             | 5                             | 1                                | .2078           |
| <i>ompT</i>     | 7                               | 7                             | 22                            | 10                               | <b>.0418</b>    |

798 **Figure 1. Omptin protease activity and distribution in clinical isolates.** (A) Omptin  
799 activity was determined by monitoring fluorescence, indicative of FRET substrate cleavage,  
800 for 60 minutes. Data points indicate mean fold change in fluorescence of each isolate over the  
801 mean fold change in fluorescence of reference UPEC strain CFT073  
802  $\left(\frac{\text{Area under the curve (AUC) clinical isolate}}{\text{AUC CFT073}}\right)$  from triplicate samples. Bars represent mean  $\pm$  SD fold  
803 change in fluorescence for each group. Bacteria that contain the *ompT* gene are indicated by  
804 circles and those that do not contain *ompT* are indicated by triangles. Indicated in green or  
805 purple are isolates that contain *arlC*. Statistical analysis was performed by one-way ANOVA  
806 followed by Tukey's *post hoc* test using GraphPad Prism software (NS, not significant; \*,  $P \leq$   
807 0.05; \*\*,  $P \leq 0.01$ ). (B) Multiplex PCR of *arlC* (852 bp), *ompT* (670 bp) and *fimH* (508 bp)  
808 from each of the clinical isolates. Amplification of *fimH* was used as a positive control.  
809 Numbers indicate isolate number for each group. Data are representative of at least three  
810 independent experiments.

811  
812 **Figure 2. Presence and expression of *ompT* and *arlC* among select UTI isolates.** (A)  
813 Southern blot of *ompT* and *arlC* from EcoRV-treated total DNA isolated from 12 cystitis-  
814 causing isolates, as well as control strains CFT073, CFT073 $\Delta$ *ompT* and plasmid DNA from  
815 pWSK*arlC*. (B) Quantitative real time PCR (qRT-PCR) of *ompT* and *arlC* from 12 clinical  
816 isolates causing cystitis, as well as from reference strain CFT073. Shown is mean  $\pm$  SD of  
817 *ompT* or *arlC* expression relative to *rpoD* calculated using the  $2^{-\Delta\text{CT}}$  method. Data are  
818 representative of 3 independent experiments. (C) Omptin activity of these cystitis clinical  
819 isolates was determined by monitoring cleavage of a synthetic FRET substrate for 60 minutes.  
820 Shown are mean  $\pm$  SD change in fluorescence of each cystitis isolate over the change in  
821 fluorescence of reference stain CFT073  $\left(\frac{\text{AUC clinical isolate}}{\text{AUC CFT073}}\right)$ . Data are representative of at least  
822 three independent experiments.

823

824 **Figure 3. Genomic context of *arlC* and *ompT*.** Schematic representation of the genomic  
825 contexts of the *ompT* (A) and *arlC* (B) genes in cystitis isolates 1, 6 and 11. Genomic contexts  
826 of *ompT* (A) and *arlC* (B) from respective reference strains CFT073 (A) and NRG857c (B)  
827 are included for comparison. Omptin genes are indicated in dark gray, light gray indicates  
828 genes located upstream and downstream of the omptin genes, stripes indicate pseudogenes  
829 and black lines indicate intergenic space.

830

831 **Figure 4. ArlC, OmpP and OmpT are functional in BL21.** (A) BL21 containing empty  
832 vector ( $\emptyset$ ) or plasmids encoding *arlC*, *ompP* or *ompT* were grown until mid-log phase and  
833 normalized to OD<sub>595</sub> 0.5. Proteins from whole cell preparations or isolated bacterial outer  
834 membranes were resolved by SDS-PAGE and transferred to a PVDF membrane. Omptins  
835 were detected by western blot using anti-CroP polyclonal antibodies. (B) A synthetic FRET  
836 peptide containing a dibasic motif (RK) was incubated with BL21 (open circles; control) or  
837 BL21 expressing *arlC* (filled squares; ArlC), *ompP* (filled circles; OmpP) or *ompT* (filled  
838 triangles; OmpT). Peptide cleavage, indicated by increased fluorescence, was monitored over  
839 time. Data show the mean  $\pm$  SD from triplicate samples and are representative of at least three  
840 independent experiments. (C) Plasmin activation by ArlC, OmpP and OmpT. Glu-  
841 plasminogen and VLKpNA (plasmin substrate) were incubated with BL21 (open circles;  
842 control), BL21(*ppla*) (open triangles; Pla), BL21(*parlC*) (filled squares; ArlC), BL21(*pompP*)  
843 (filled circles; OmpP), or BL21(*pompT*) (filled triangles; OmpT) strains. Absorbance at 405  
844 nm was monitored over time. Data were normalized by subtracting initial absorbance from all  
845 values. Data represent mean  $\pm$  SD and are representative of at least three independent  
846 experiments.

847

848 **Figure 5. ArlC, OmpP and OmpT cleave cathelicidins.** (A) AMP-cleavage assay. AMPs  
849 were incubated with BL21 alone or BL21 expressing *arlC*, *ompP* or *ompT* for the indicated  
850 times. Resulting AMP-cleavage products were separated by Tris-Tricine SDS-PAGE, fixed  
851 with glutaraldehyde and visualized by coomassie staining. M indicates molecular weight  
852 marker. Data are representative of three independent experiments. (B) Amino acid sequence  
853 of AMPs cleaved in (A) with dibasic motifs highlighted in magenta and sequence length  
854 indicated in parenthesis. (C) Far UV circular dichroism spectra (200-260 nm) of the indicated  
855 peptides measured in PBS. Data were normalized by subtracting spectra from PBS alone from  
856 the sample spectra. MRE indicates  $\text{degree} \times \text{cm}^2 \times \text{dmol}^{-1}$ .

857

858 **Figure 6. ArlC cleaves RNase 7.** (A) Pymol generated image of RNase 7 (Refs; PDB 2hky),  
859 peptide backbone is shown in blue, cysteines and disulfide bridges are in yellow and dibasic  
860 sites are coloured magenta. Numbers correspond to the following the locations of the dibasic  
861 sites in the protein sequence: 1, residues 35 and 36; 2, residues 96 and 97; 3, residues 111 and  
862 112. (B) Proteolytic cleavage of RNase 7. RNase 7 was incubated with BL21 containing  
863 empty vector ( $\emptyset$ ) or BL21 expressing *arlC*, *ompP* or *ompT* for 60 or 90 minutes. Cleavage  
864 products (arrows) were separated by SDS-PAGE and visualized by coomassie staining. M  
865 indicates molecular weight marker. Data are representative of three independent experiments.

866

**A**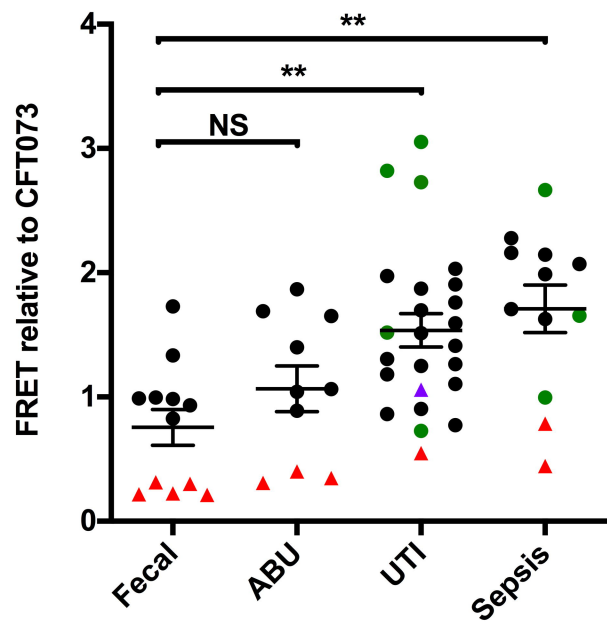**B**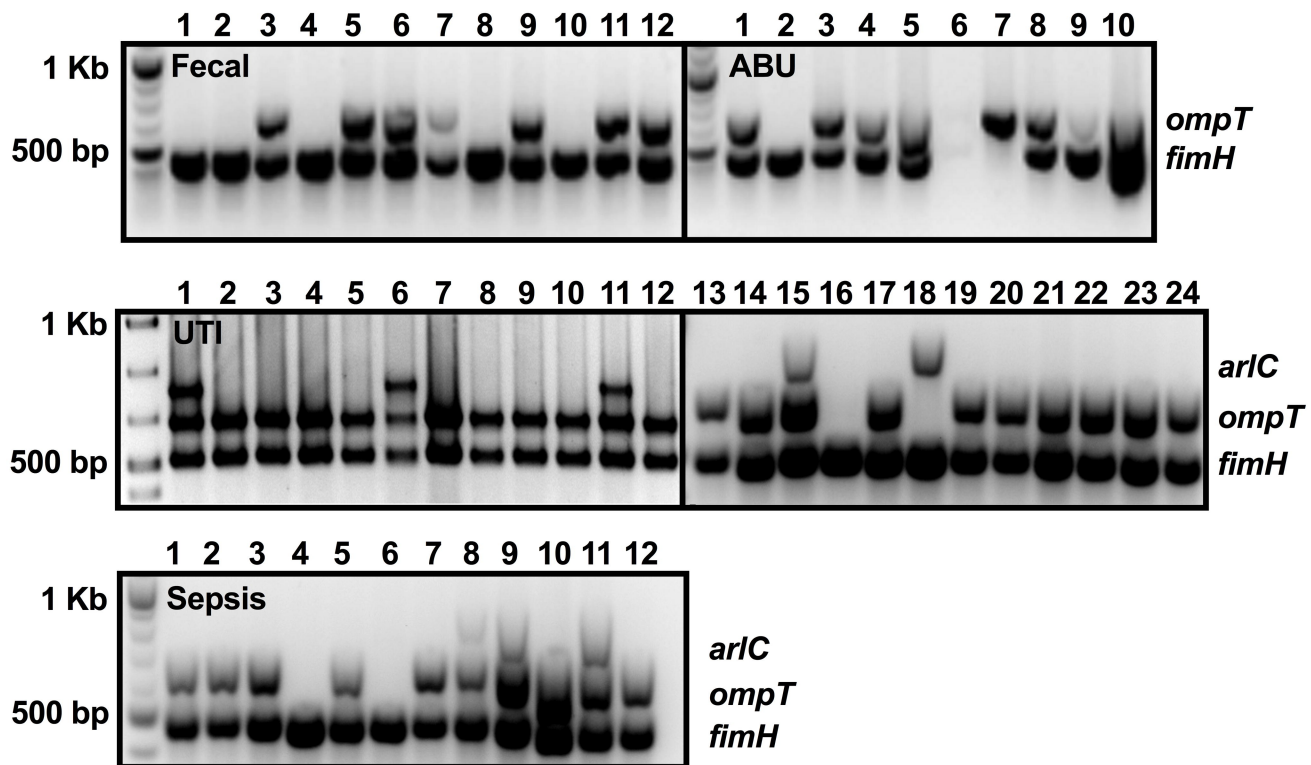**Figure 1**

**A**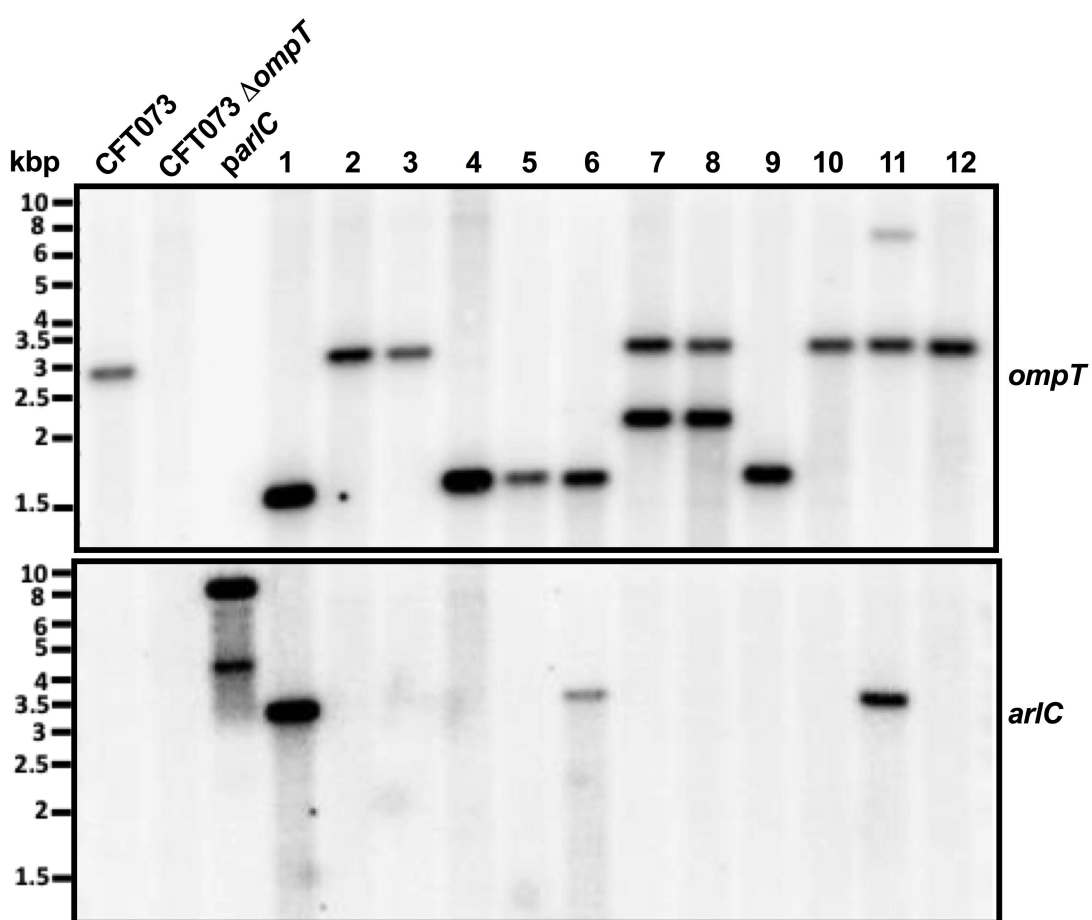**B**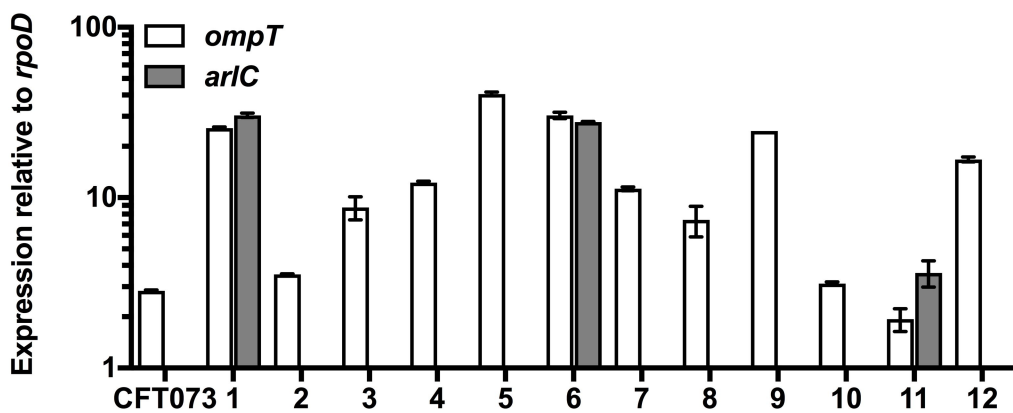**C**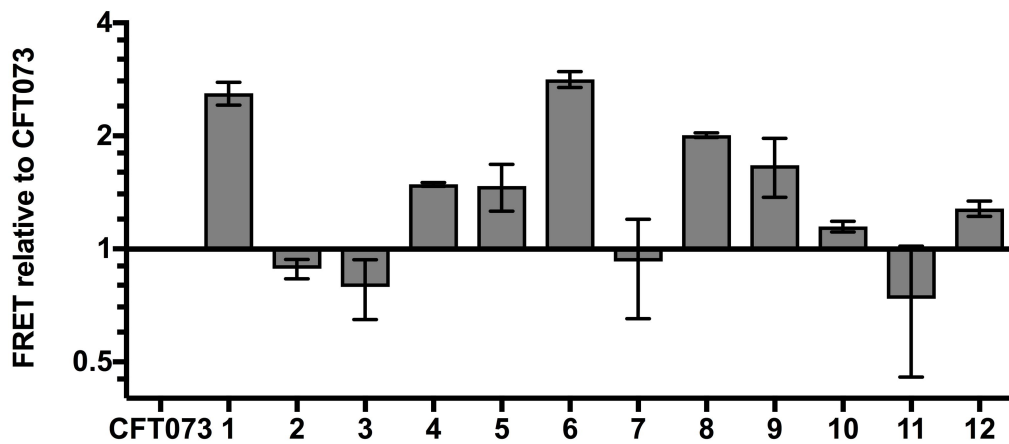**Figure 2**

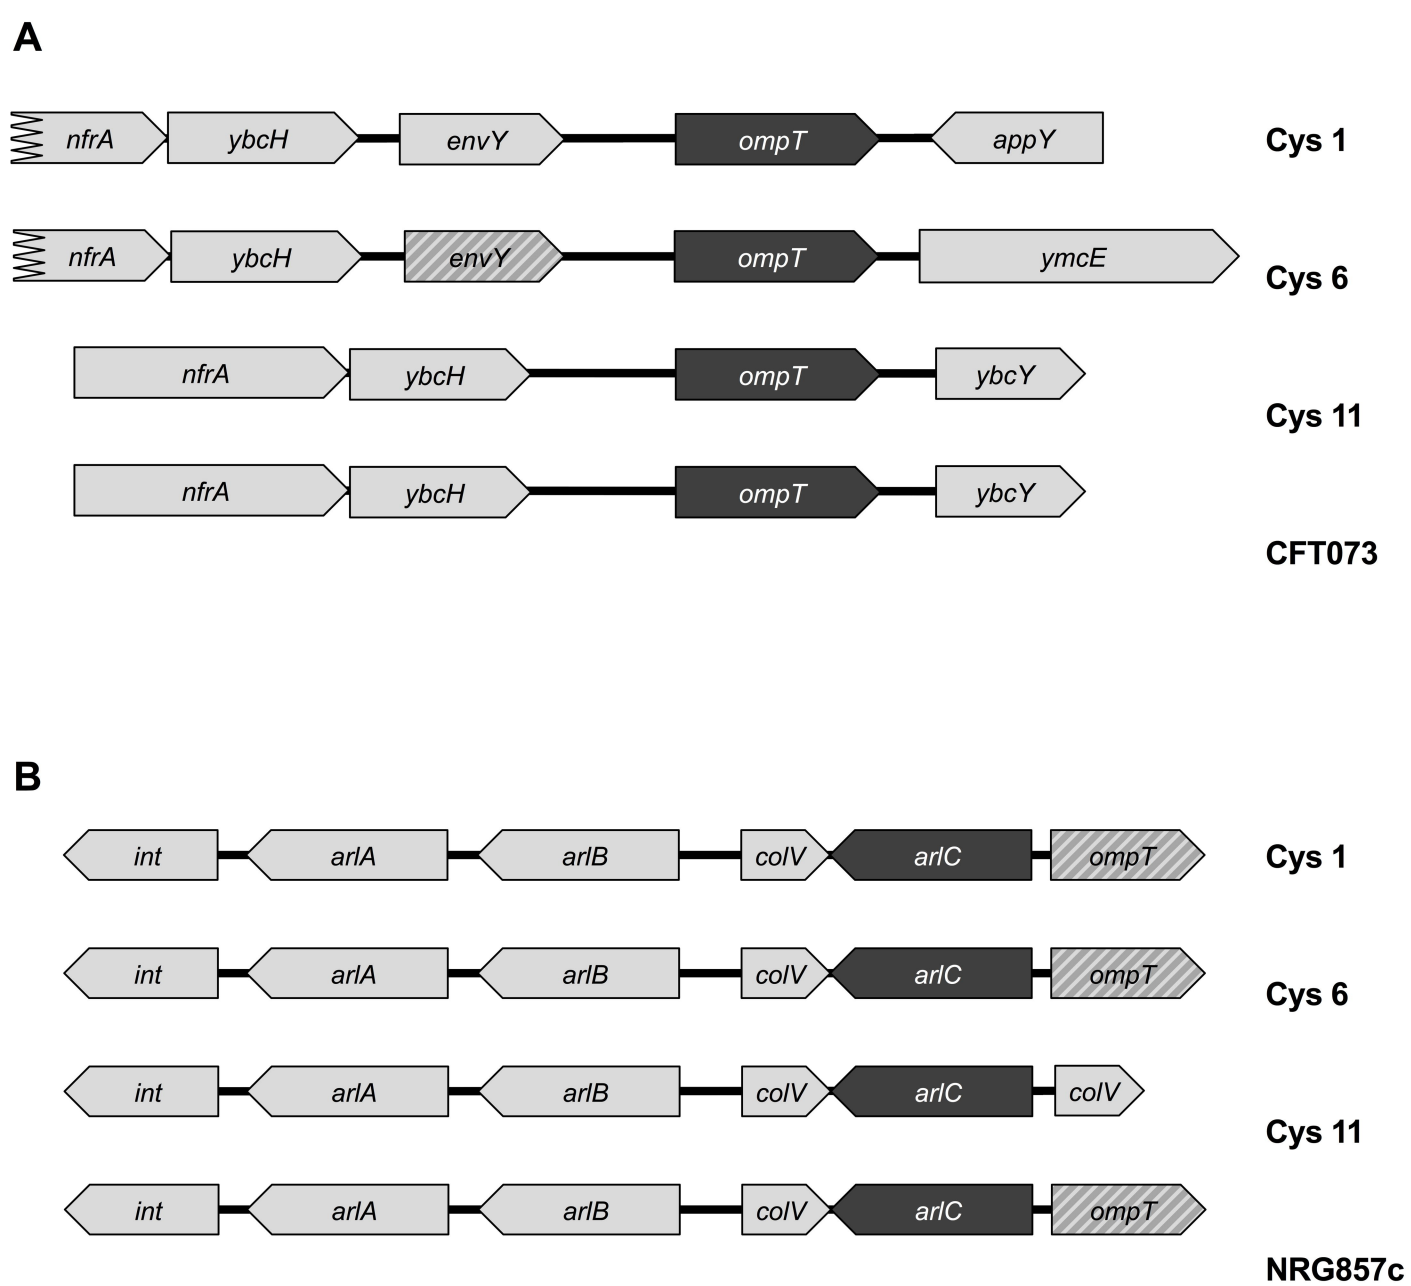

**Figure 3**



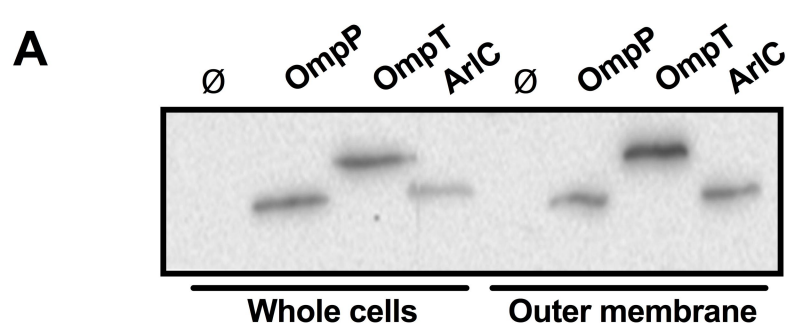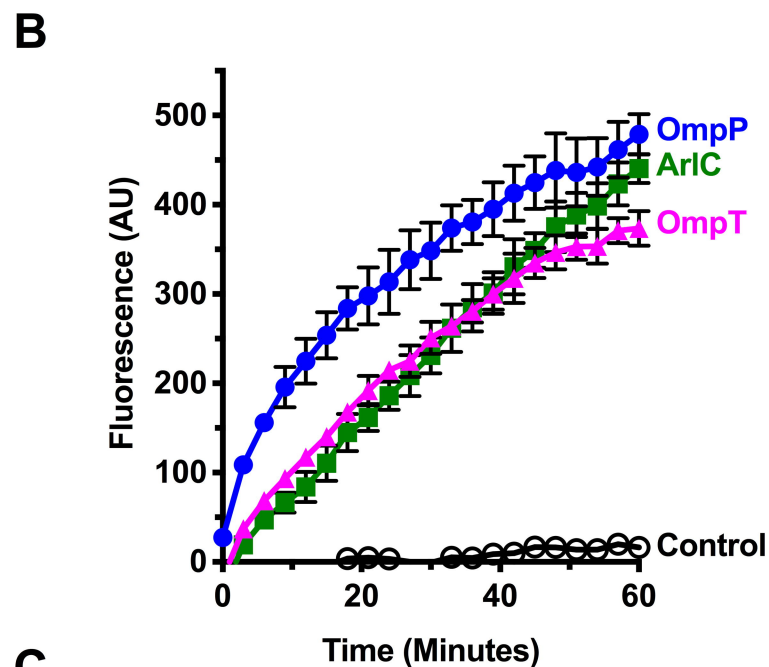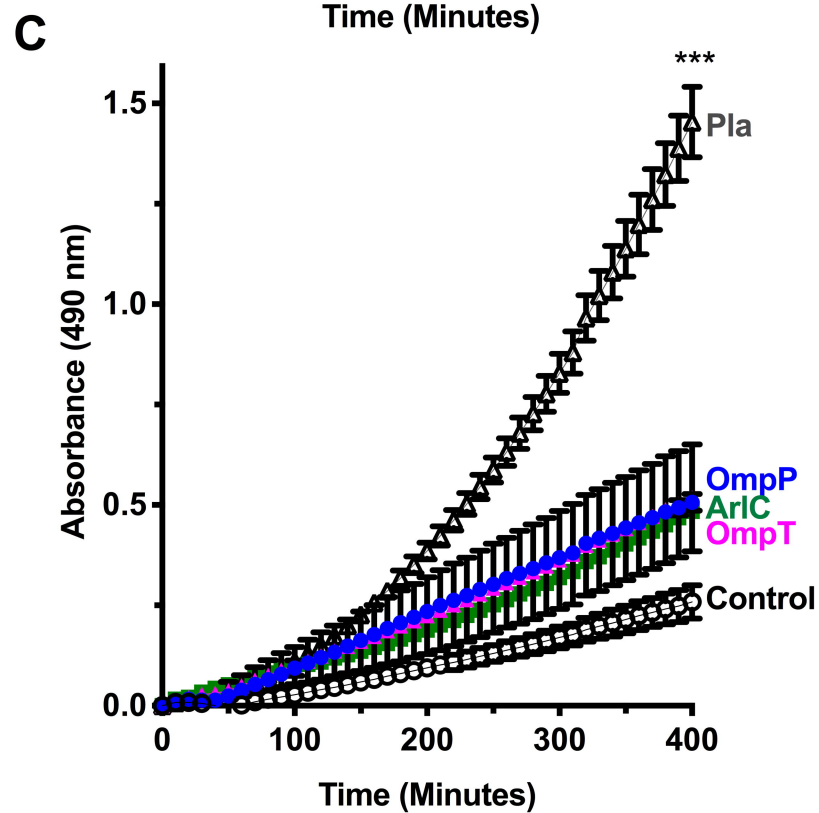

Figure 4

**A**

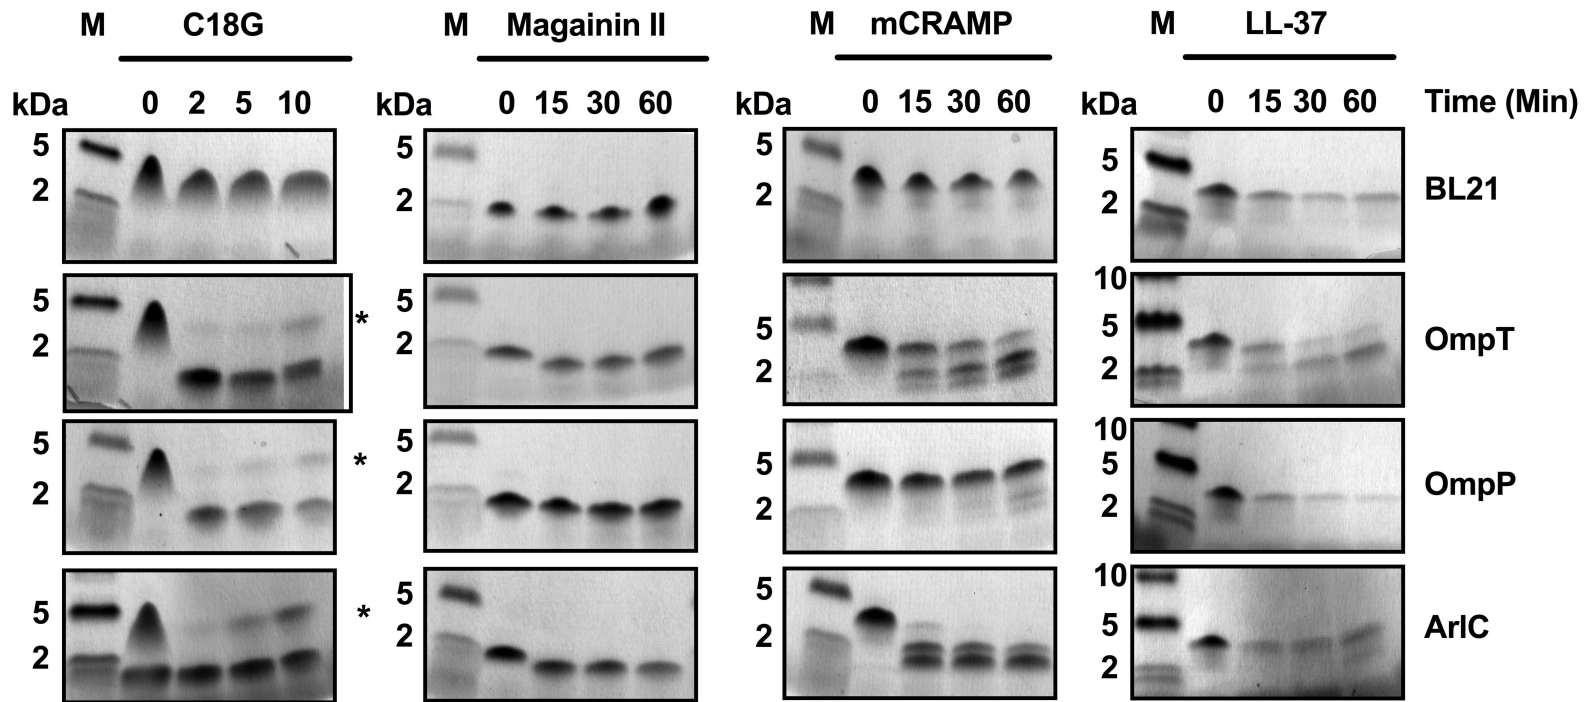

**B**

C18G (18) ALY**K**LL**K**LL**K**SA**K**KL**G**  
Magainin II (23) GIGKFLHSA**K**FGKAFVGEIMNS  
mCRAMP (34) GLL**R****K**GG**E**KIG**E**KL**K**IG**Q**KIK**N**FF**Q**KL**V**P**Q**PE**Q**  
LL-37 (37) LLGDFF**R****K**SKEKIGKEF**K**R**I**V**Q**RI**K**DFL**R**N**L**V**P**RT**E**S

**C**

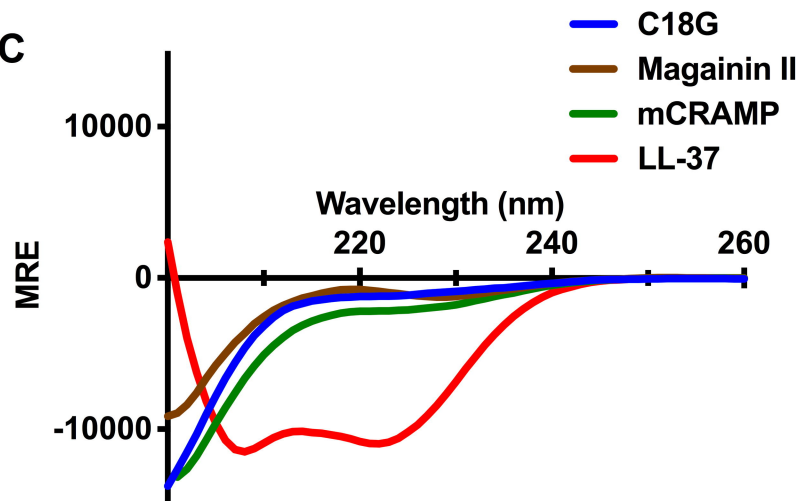

**Figure 5**

**A**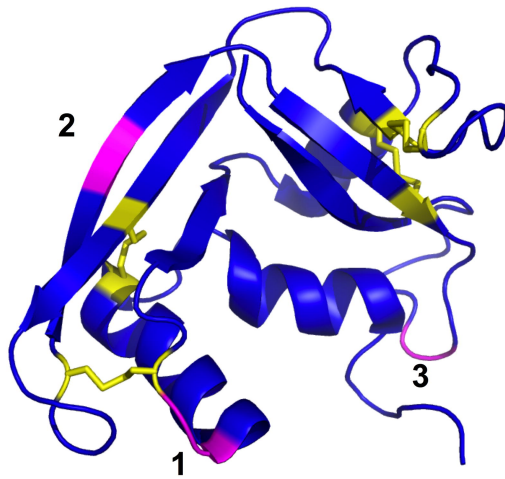**B**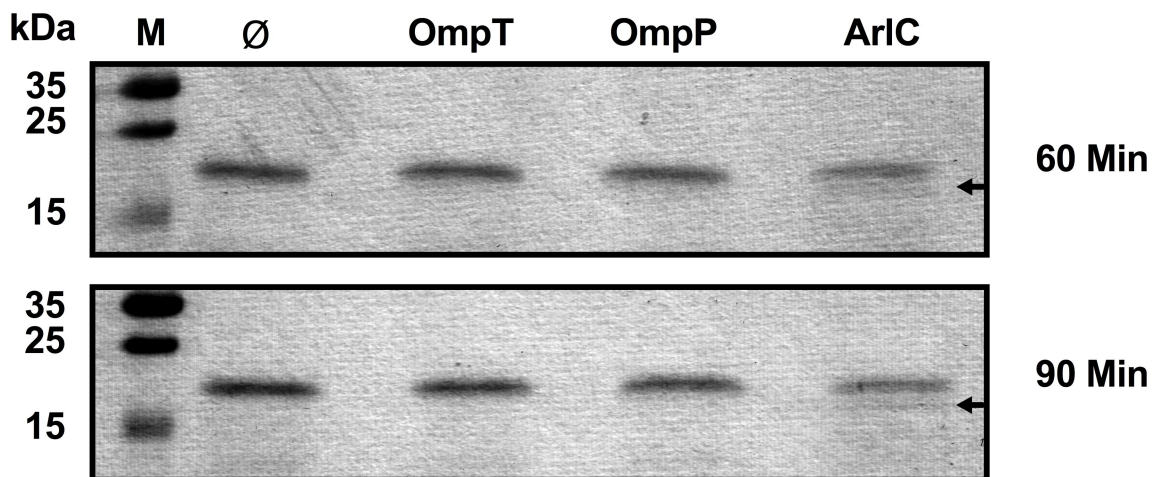**Figure 6**
